# Supplementary material for: Nonanebis(peroxoic acid): a stable peracid for oxidative bromination of aminoanthracene-9,10-dione
Source: publisher site journal article supplement (doi:10.3762/bjoc.10.90), 2014-04-24
Supplement: Additional file 1 [file 1860-5397-10-90-S1.pdf]

**Supporting Information File 1**  
**for**  
**Nonanebis(peroxoic acid): a stable peracid for oxidative**  
**bromination of aminoanthracene-9,10-dione**

Vilas Venunath Patil and Ganapati Subray Shankarling\*

Address: Department of Dyestuff Technology, Institute of Chemical Technology, N. P. Marg,  
Matunga, Mumbai - 400019, India. Tel.: 91-22-33612708, Fax: 91-22-33611020

E-mail: Ganapati S. Shankarling\* - gsshankarling@gmail.com

\*Corresponding author

**Characterization details for all the products in Table 4**

## Experimental details:

**1-Amino-2,4-dibromoanthracene-9,10-dione (2a).** As per general procedure, the reaction of **1a** ( 2.24 mmol, 1 equiv) with KBr ( 4.48 mmol, 2 equiv) and nonanebis(peroxoic acid) ( 2.24 mmol, 1 equiv) in 5 mL acetic acid at 30–32 °C gives orange colored solid **2a** (0.79 g, 92% yield): mp (measured) 224 °C (from hexane); IR :  $\lambda_{\text{max}}/\text{cm}^{-1}$  3395 (NH), 1670.05 and 1580.38 (CO), 715.4 (C-Br);  $^1\text{H}$  NMR : (400MHz, DMSO)  $\delta$ (ppm): 7.88-7.91 (d, 2H, Ar-H), 8.10-8.19 (t, 2H, Ar-H); 8.23 (s, 1H, Ar-H); MS : m/z (EI) 380.1 (M + H) for  $^{79}\text{Br}$ .  $\text{C}_{14}\text{H}_7\text{Br}_2\text{NO}_2$  calculated m/z: 379.2.

**2-Amino-3-bromo-1-chloroanthracene-9,10-dione (2b).** As per general procedure, the reaction of **1b** ( 1.94 mmol, 1 equiv) with KBr ( 1.94 mmol, 1 equiv) and nonanebis(peroxoic acid) (0.97 mmol, 0.5 equiv) in 5 mL acetic acid at 30–32 °C gives yellow colored solid **2b** (0.60 g, 92% yield) : mp (measured) 238 °C (from hexane); IR :  $\lambda_{\text{max}}/\text{cm}^{-1}$  3489 and 3384 (NH), 1671 and 1653 (CO), 789.7 (C-Br), 814.77 (C-Cl) ;  $^1\text{H}$ -NMR : (400MHz, DMSO)  $\delta$ (ppm): 6.86 (s, 2H, weak, -N-H), 7.87 – 7.89 (d, 2H, Ar-H), 8.10-8.14 (t, 2H, Ar-H), 8.22 (s, 1H, Ar-H); MS: m/z (EI) 336.1 (M + H) for  $^{79}\text{Br}$ ,  $^{35}\text{Cl}$ .  $\text{C}_{14}\text{H}_7\text{BrClNO}_2$  calculated m/z: 334.9.

**1-Amino-2, 4-dibromo-5-chloroanthracene-9,10-dione (2c).** As per general procedure, the reaction of **1c** (1.94 mmol, 1 equiv.) with KBr ( 3.88 mmol, 2 equiv.) and nonanebis(peroxoic acid)( 1.94 mmol, 1 equiv.) in 5 ml acetic acid at 30 to 32 °C gives orange colored solid **2c** (0.75g, 93% yield) : mp (measured) 246 °C (From Hexane); IR:  $\lambda_{\text{max}}/\text{cm}^{-1}$  3450 and 3304 (NH), 1675 and 1639 (CO), 739 (C-Br), 810.9 (C- Cl);  $^1\text{H}$  NMR : (400MHz,  $\text{CDCl}_3$ )  $\delta$ (ppm): 7.6-7.65 (t, 1H), 7.7 – 7.8 (t, 1H, Ar-H), 8.05 (s, 1H, Ar-H), 8.2 (d, 1H, Ar-H); MS : m/z (EI) 414.1 (M + H) for  $^{79}\text{Br}$ ,  $^{35}\text{Cl}$ .  $\text{C}_{14}\text{H}_6\text{Br}_2\text{ClNO}_2$  calculated m/z: 412.8.

**2-Amino-1,3-dibromoanthracene-9,10-dione (2d).** As per general procedure, the reaction of **1d** ( 2.24 mmol, 1 equiv) with KBr (4.48 mmol, 2 equiv) and nonanebis(peroxoic acid) ( 3.36 mmol, 1.5 equiv) in 5 mL acetic acid at 30– 32 °C gives orange yellow colored solid **2d** (0.79g, 96% yield) : mp (measured) 250 °C (from hexane); IR :  $\lambda_{\text{max}}/\text{cm}^{-1}$  3479, 3377 (NH), 1672 and 1581 (CO), 705 (C-Br);  $^1\text{H}$  NMR : (400MHz, DMSO)  $\delta$ (ppm): 6.755 (s, 2H, N-H), 7.86 - 7.89 (m, 2H, Ar-H), 8.09 – 8.14 (m, 2H, Ar-H), 8.26 (s, 1H, Ar-H) ; MS : m/z (EI) 380.1 (M + H) for  $^{79}\text{Br}$ .  $\text{C}_{14}\text{H}_7\text{Br}_2\text{NO}_2$  calculated m/z: 379.2.

**1-Amino-2,4-dibromo-5-(phenylamino)anthracene-9,10-dione (2e):** As per general procedure, the reaction of **1e** (1.59 mmol, 1 equiv) with KBr (3.18 mmol, 2 equiv) and nonanebis(peroxoic acid) (1.91 mmol, 1.1 equiv.) in 5 mL acetic acid at 30–32 °C gives brown colored solid **2e** (0.94 g, 80% yield) : mp 209-210 °C (from hexane). IR :  $\lambda_{\text{max}}/\text{cm}^{-1}$  3477 and 3319 (NH), 715 (C-Br); <sup>1</sup>H-NMR: (400MHz, CDCl<sub>3</sub>)  $\delta$  (ppm): 7.26-7.60 (m, 4H, Ar-H), 7.78-7.84 (m, 2H, Ar-H), 8.085 (s, 1H, Ar-H), 8.10-8.15 (d, 2H, Ar-H), 9.25-9.32 (dd, 1H, Ar-H) 12.83 (s, weak, N-H), 13.26 (s, weak, N-H); MS: m/z (EI) 469.2 (M - H) for <sup>79</sup>Br. C<sub>20</sub>H<sub>12</sub>Br<sub>2</sub>N<sub>2</sub>O<sub>2</sub> calculated m/z: 469.9.

**1,5-Diamino-2,4,6,8-tetrabromoanthracene-9,10-dione (2f):** As per general procedure, the reaction of **1f** (2.1 mmol, 1 equiv) with KBr (8.4 mmol, 4 equiv) and nonanebis(peroxoic acid) (4.2 mmol, 2 equiv) in 5 mL acetic acid at 30–32 °C gives brown colored solid **2f** (0.94 g, 80% yield): mp (measured on DSC) 263.5 °C (from hexane) (lit. 249.5 °C); IR :  $\lambda_{\text{max}}/\text{cm}^{-1}$  3477 and 3319 (NH), 715 (C-Br); 3477 and 3319 (NH), 1670 and 1580 (CO), 715 (C-Br); <sup>1</sup>H NMR : (400MHz, DMSO)  $\delta$ (ppm): 7.36–7.97 (2H, m, Ar-H); MS : m/z (EI) 551.5 (M + H) for <sup>79</sup>Br. C<sub>14</sub>H<sub>6</sub>Br<sub>4</sub>N<sub>2</sub>O<sub>2</sub> calculated m/z: 550.2.

**1-Amino-2-bromo-4-methoxyanthracene-9,10-dione (2g):** As per general procedure, the reaction of **1g** (1.97 mmol, 1 equiv) with KBr (1.48 mmol, 0.75 equiv) and nonanebis(peroxoic acid) (1.58 mmol, 0.8 equiv) in 5 ml acetic acid at 30–32 °C gives brown colored solid **2g** (0.57 g, 86% yield) : mp (measured) 178 °C (from hexane); IR :  $\lambda_{\text{max}}/\text{cm}^{-1}$  3435 and 3285 (NH), 1659 and 1625 (CO), 782 (C-Br); <sup>1</sup>H NMR : (400MHz, DMSO)  $\delta$ (ppm): 3.98 (s, 3H, -OCH<sub>3</sub>), 4.06 (s, 1H, N-H), 7.62 (s, 1H, Ar-H), 7.73-7.74 (d, 2H, Ar-H), 8.22-8.26 (m, 2H, Ar-H); MS: m/z (EI) 332.2 (M + H) for <sup>79</sup>Br. C<sub>15</sub>H<sub>10</sub>BrNO<sub>3</sub> calculated m/z: 330.9.

**N-(4-Amino-3-bromo-9,10-dioxo-9,10-dihydroanthracen-1-yl)benzamide (2h).** As per general procedure, the reaction of **1h** (1.46 mmol, 1 equiv) with KBr (1.24 mmol, 0.85 equiv) and nonanebis(peroxoic acid) (1.6 mmol, 1.1 equiv) in 5 mL acetic acid at 50–55 °C gives brown colored solid **2h** (0.51 g, 83% yield) : mp (measured) 248 °C (from toluene); IR :  $\lambda_{\text{max}}/\text{cm}^{-1}$  3464.49 and 3269.72 (NH), 1669.09.05 and 1628.59 (CO), 735.71 (C-Br); <sup>1</sup>H NMR : (400MHz, DMSO)  $\delta$ (ppm): 7.64- 7.67 (m, 3H, Ar-H), 7.87-7.93 (d, 2H, Ar-H), 8.02-8.05 (d, 2H, Ar-H), 8.21-8.23 (t, 2H, Ar-H), 9.41 (s, 1H, Ar-H), 13.1 (s, 1H, -CONH); MS: m/z (EI) 421.3 (M + H) for <sup>79</sup>Br. C<sub>21</sub>H<sub>13</sub>BrN<sub>2</sub>O<sub>3</sub> calculated m/z: 420.01.

**2,4-Dibromo-1-(methylamino)anthracene-9,10-dione (2i).** As per general procedure, the reaction of **1i** (2.1 mmol, 1 equiv) with KBr (4.21 mmol, 2 equiv) and nonanebis(peroxoic acid) (2.52 mmol, 1.2 equiv) in 5 mL acetic acid at 50–55 °C gives brown colored solid **2i** (0.724 g, 87% yield) : mp (measured) 154 °C (from hexane); IR :  $\lambda_{\text{max}}/\text{cm}^{-1}$  3456 (NH), 1672

and 1625 (CO), 737 (C-Br);  $^1\text{H NMR}$  : (400Mz,  $\text{CDCl}_3$ )  $\delta$ (ppm): 3.06 (s, 3H,  $-\text{CH}_3$ ), 7.85-7.88 (d, 2H, Ar-H), 8.09-8.12 (t, 2H, Ar-H), 8.16 (s, 1H, Ar-H), 8.98 (s, 1H,  $-\text{NH}$ ); MS : m/z (EI) 394.1 (M + H) for  $^{79}\text{Br}$ .  $\text{C}_{15}\text{H}_9\text{Br}_2\text{NO}_2$  calculated m/z: 393.2

**2,4-Dibromo-1-(ethylamino)anthracene-9,10-dione (2j)**. As per general procedure, the reaction of **1j** (1.99 mmol, 1 equiv) with KBr (3.97 mmol, 2 equiv) and nonanebis(peroxoic acid) (2.38 mmol, 1.2 equiv) in 5 mL acetic acid at 50–55 °C gives brown colored solid **2j** (0.76 g , 93% yield) : mp (measured) 158 °C (from hexane); IR :  $\lambda_{\text{max}}/\text{cm}^{-1}$  3460 (NH), 1671 and 1626 (CO), 738 (C-Br);  $^1\text{H NMR}$  : (400MHz, DMSO)  $\delta$ (ppm): 1.3-1.4 (t, 3H,  $-\text{CH}_3$ ), 3.7-3.8 (q, 2H,  $-\text{CH}_2$ ) 7.7-7.8 (d, 2H, Ar-H), 8.1-8.18 (s, 1H, Ar-H), 8.2-8.3 (t, 2h, Ar-H), 9.9 (s, 1H,  $-\text{NH}$ ); MS : m/z (EI) 408.1 (M + H) for  $^{79}\text{Br}$ .  $\text{C}_{16}\text{H}_{11}\text{Br}_2\text{NO}_2$  calculated m/z: 406.9.

**3-Bromo-7H-benzo[*d,e*]anthracen-7-one (2k)**: As per general procedure, the reaction of **1k** (2.17 mmol, 1 equiv.) with KBr (2.38 mmol, 1.1 equiv) and nonanebis(peroxoic acid) (2.6 mmol, 1.2 equiv) in 5 mL acetic acid at 50–55 °C gives dark yellow colored solid **2k** (0.61 g, 88% yield) : mp (measured) 168 °C (from hexane); IR :  $\lambda_{\text{max}}/\text{cm}^{-1}$  1649.8 (CO), 780 (C-Br);  $^1\text{H NMR}$  : (400MHz, DMSO)  $\delta$ (ppm): 7.64-7.66 (t, 1H, Ar-H), 7.85-7.90 (t, 1H, Ar-H), 8.01-8.06 (t, 1H, Ar-H), 8.15-8.18 (d, 1H, Ar-H), 8.31-8.34 (d, 1H, Ar-H), 8.6-8.72 (m, 4H, Ar-H); MS : m/z (EI) 309.2 (M + H) for  $^{79}\text{Br}$ .  $\text{C}_{17}\text{H}_9\text{BrO}$  calculated m/z: 307.9.
