# Supplementary material for: Nonanebis(peroxoic acid): a stable peracid for oxidative bromination of aminoanthracene-9,10-dione
Source: publisher site journal article supplement (doi:10.3762/bjoc.10.90), 2014-04-24
Supplement: Additional file 2 [file 1860-5397-10-90-S2.pdf]

# Supporting Information File 2

for

## Nonanebis(peroxoic acid): a stable peracid for oxidative bromination of aminoanthracene-9,10-dione

Vilas Venunath Patil and Ganapati Subray Shankarling\*

Address: Department of Dyestuff Technology, Institute of Chemical Technology, N. P. Marg,

Matunga, Mumbai - 400019, India. Tel.: 91-22-33612708, Fax: 91-22-33611020

E-mail: Ganapati S. Shankarling\* - gsshankarling@gmail.com

\*Corresponding author

**FTIR, mass and <sup>1</sup>H NMR spectra of all products in Table 4, Differential Scanning Colorimetric (DSC) analysis and calculations for shock sensitivity of nonanebis(peroxoic acid), HPLC analysis details, procedure for the detection of % active oxygen content (%AOC).**

### Table of Contents

|                                          |         |
|------------------------------------------|---------|
| FTIR Spectra                             | S2–S12  |
| EIMS Spectra                             | S13–S23 |
| <sup>1</sup> H NMR Spectra               | S24–S34 |
| DSC analysis of nonanebis(peroxoic acid) | S35–S36 |
| HPLC Analysis specification              | S37     |
| Determination of % Active Oxygen Content | S38     |
| Reference                                | S39     |

# FTIR Spectra

## 1) 1-Amino-2,4-dibromoanthracene-9,10-dione (2a)

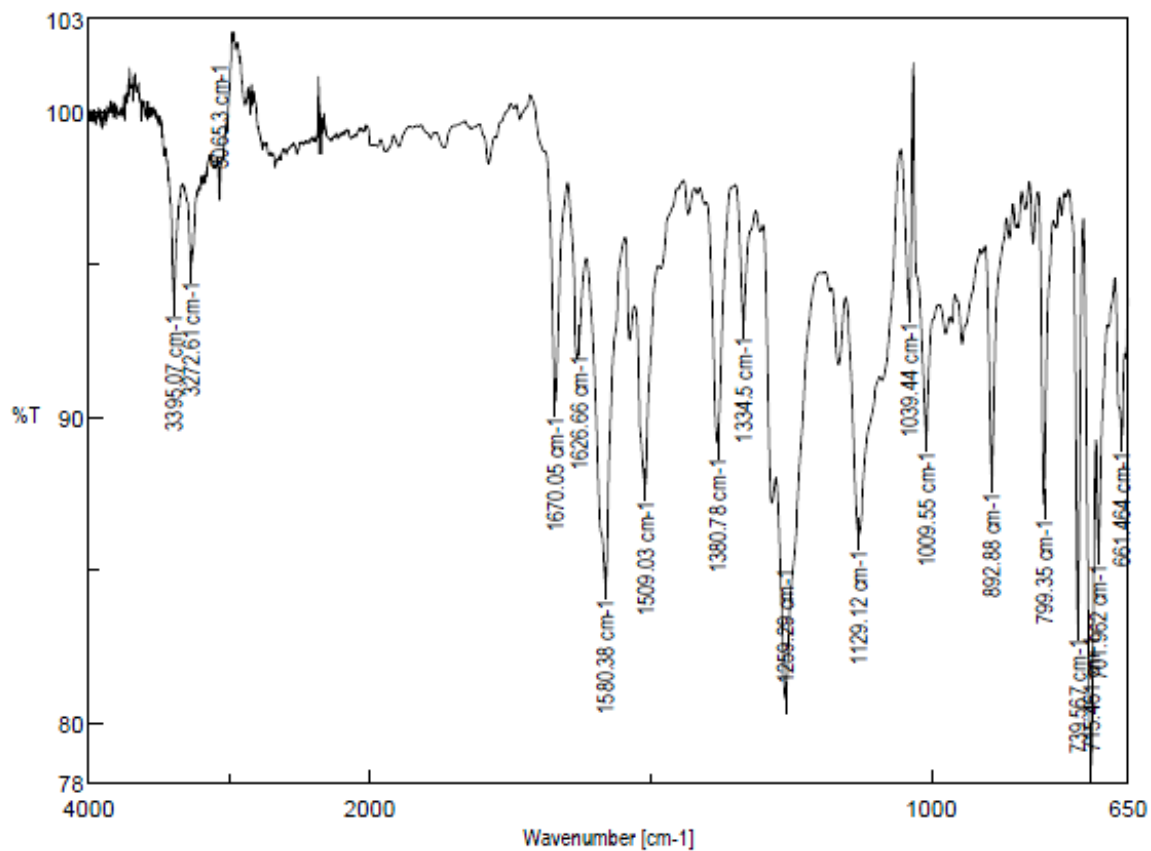

## 2) 2-Amino-3-bromo-1-chloroanthracene-9,10-dione (2b)

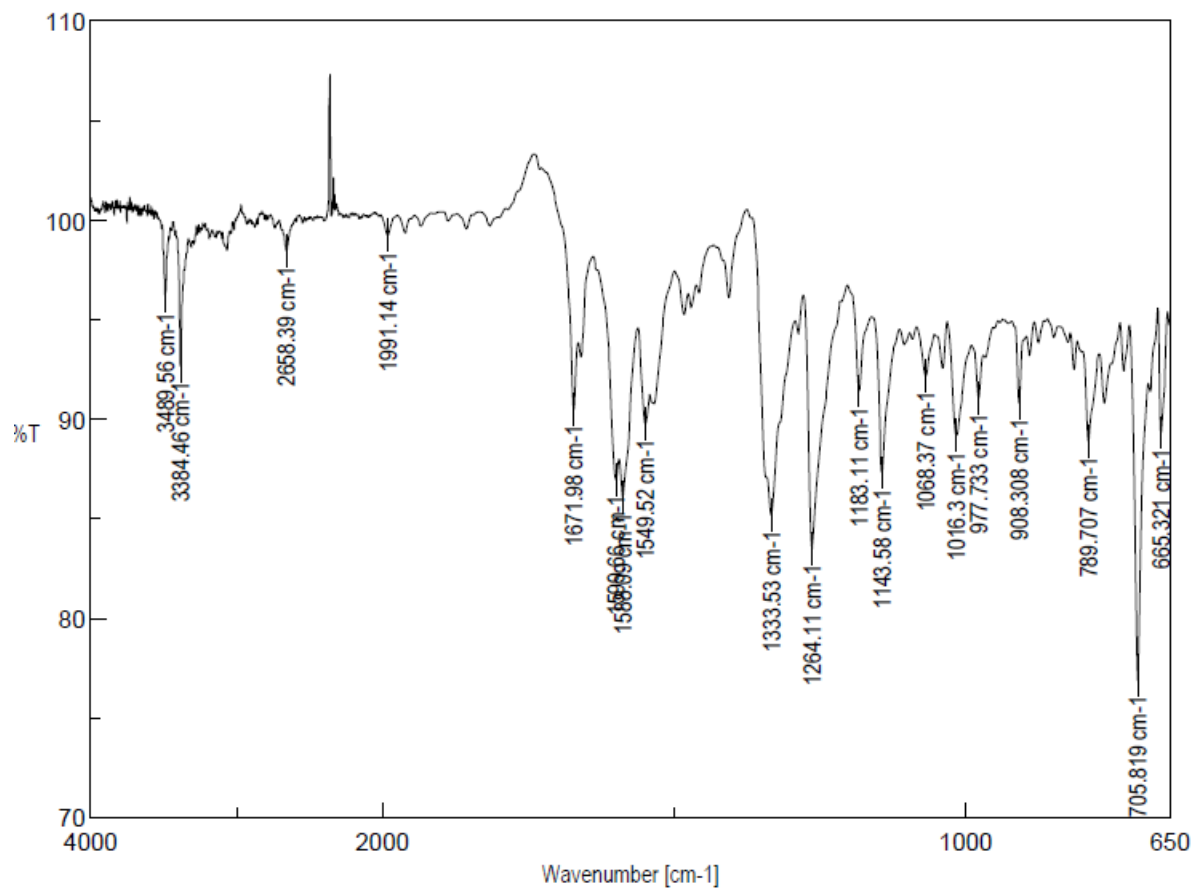

3) 1-Amino-2, 4-dibromo-5-chloroanthracene-9,10-dione (2c)

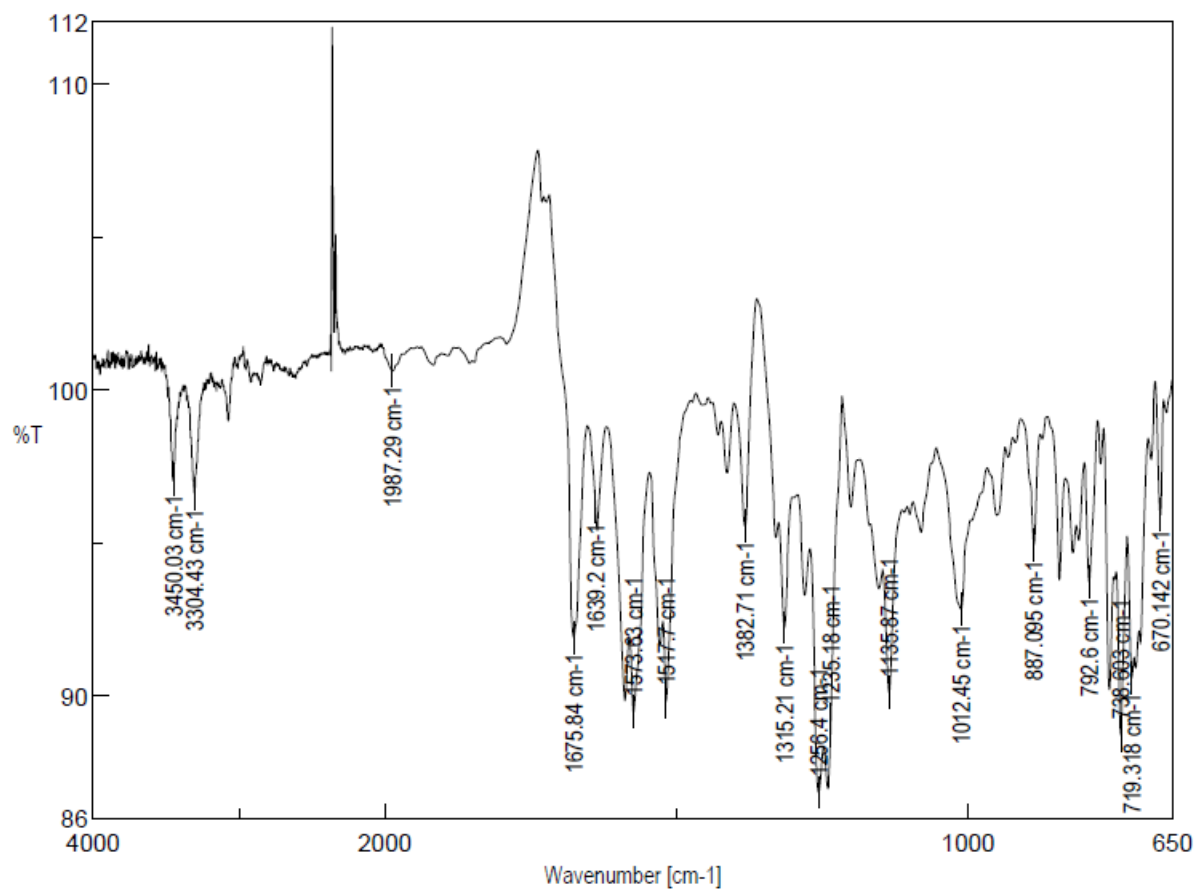

#### 4) 2-Amino-1,3-dibromoanthracene-9,10-dione (2d)

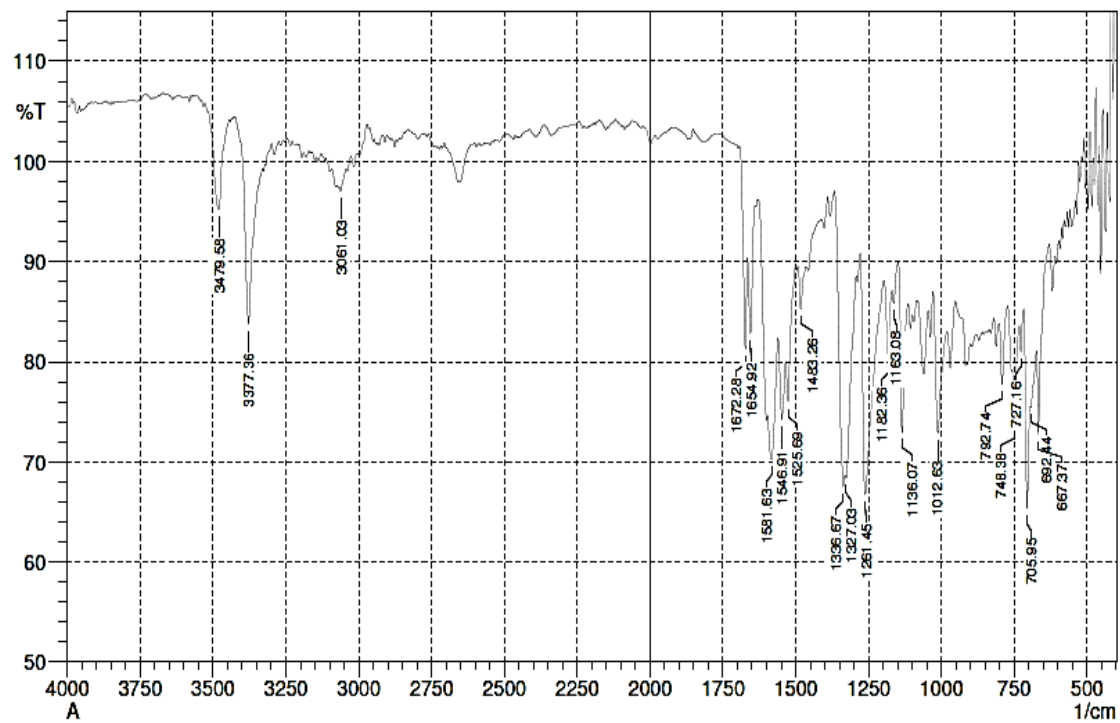

5) 1-Amino-2,4-dibromo-5-(phenylamino)anthracene-9,10-dione (2e)

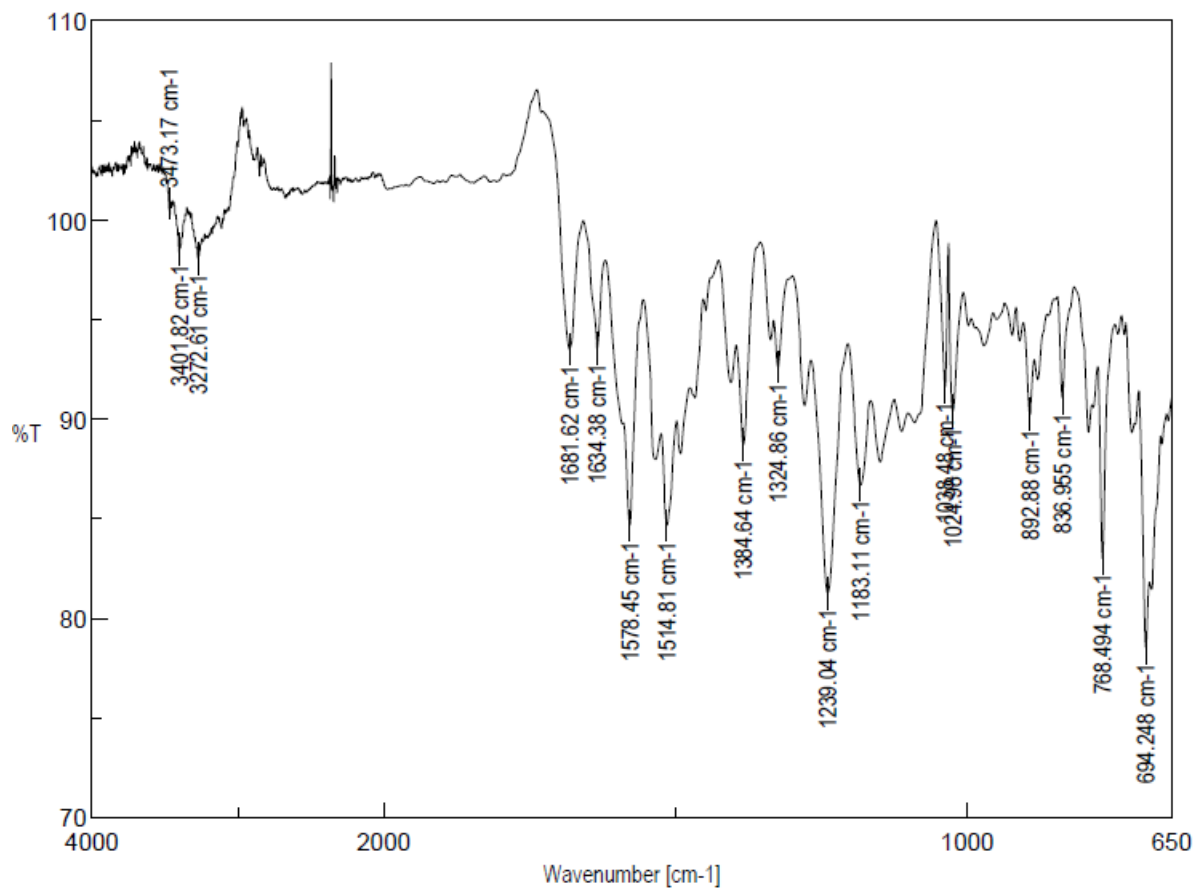

6) 1,5-Diamino-2,4,6,8-tetrabromoanthracene-9,10-dione (2f)

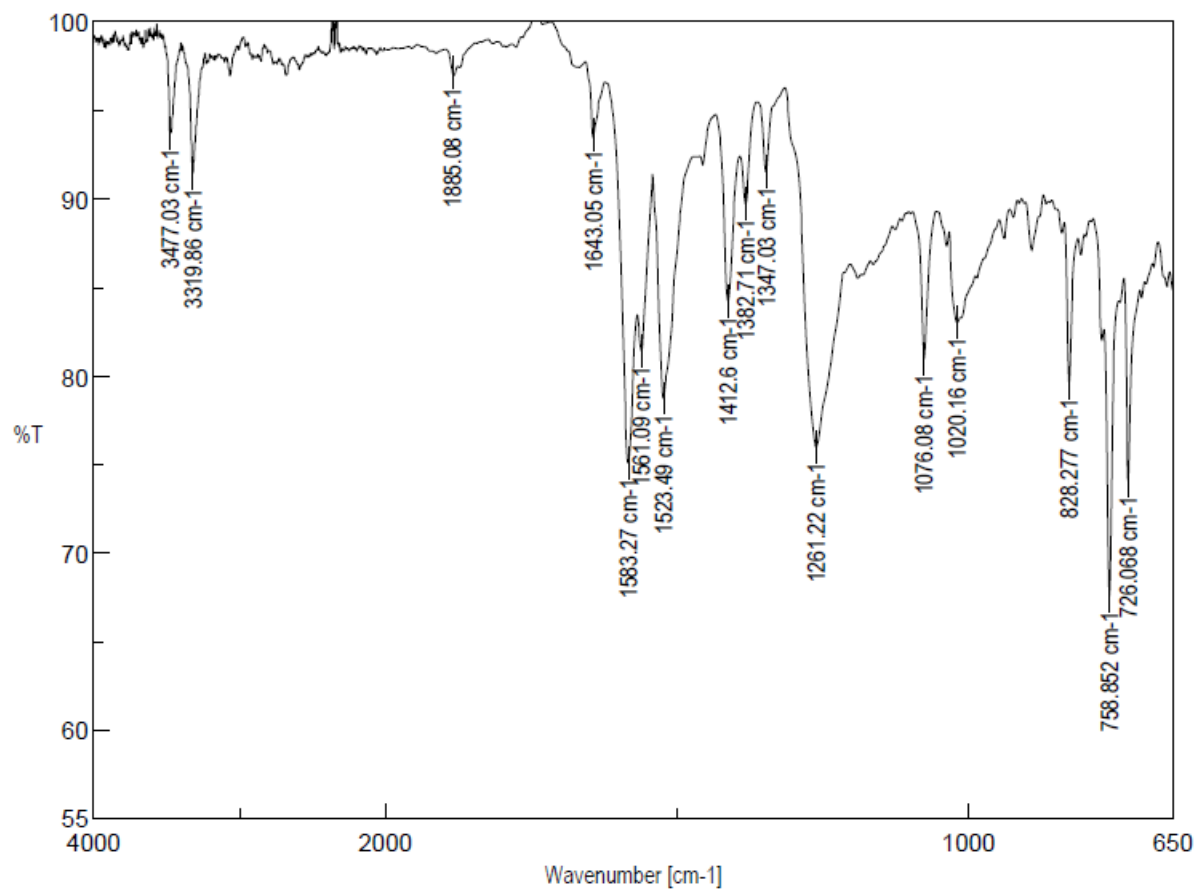

7) 1-Amino-2-bromo-4-methoxyanthracene-9,10-dione (2g)

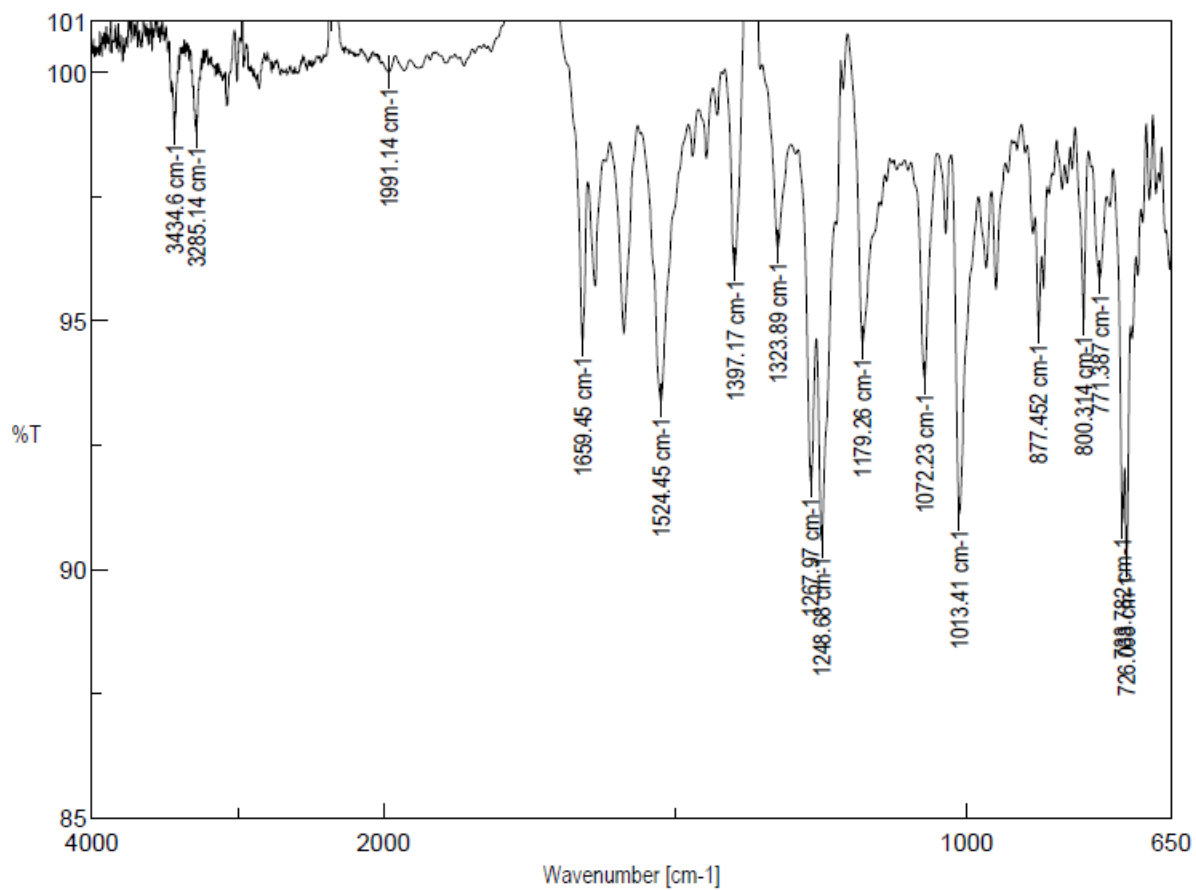

1-



8) *N*-(4-amino-3-bromo-9,10-dioxo-9,10-dihydroanthracen-1-yl)benzamide (2h)

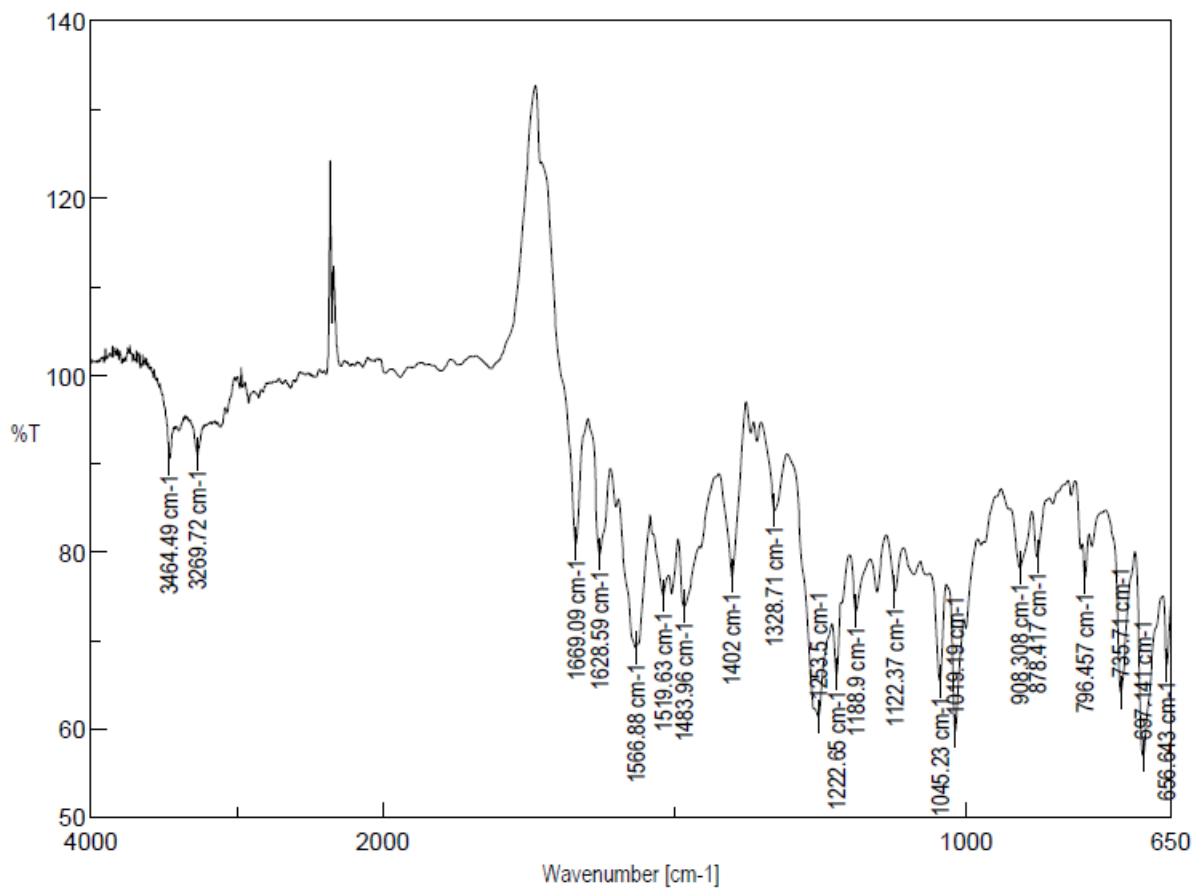

9) 2,4-Dibromo-1-(methylamino)anthracene-9,10-dione (2i)

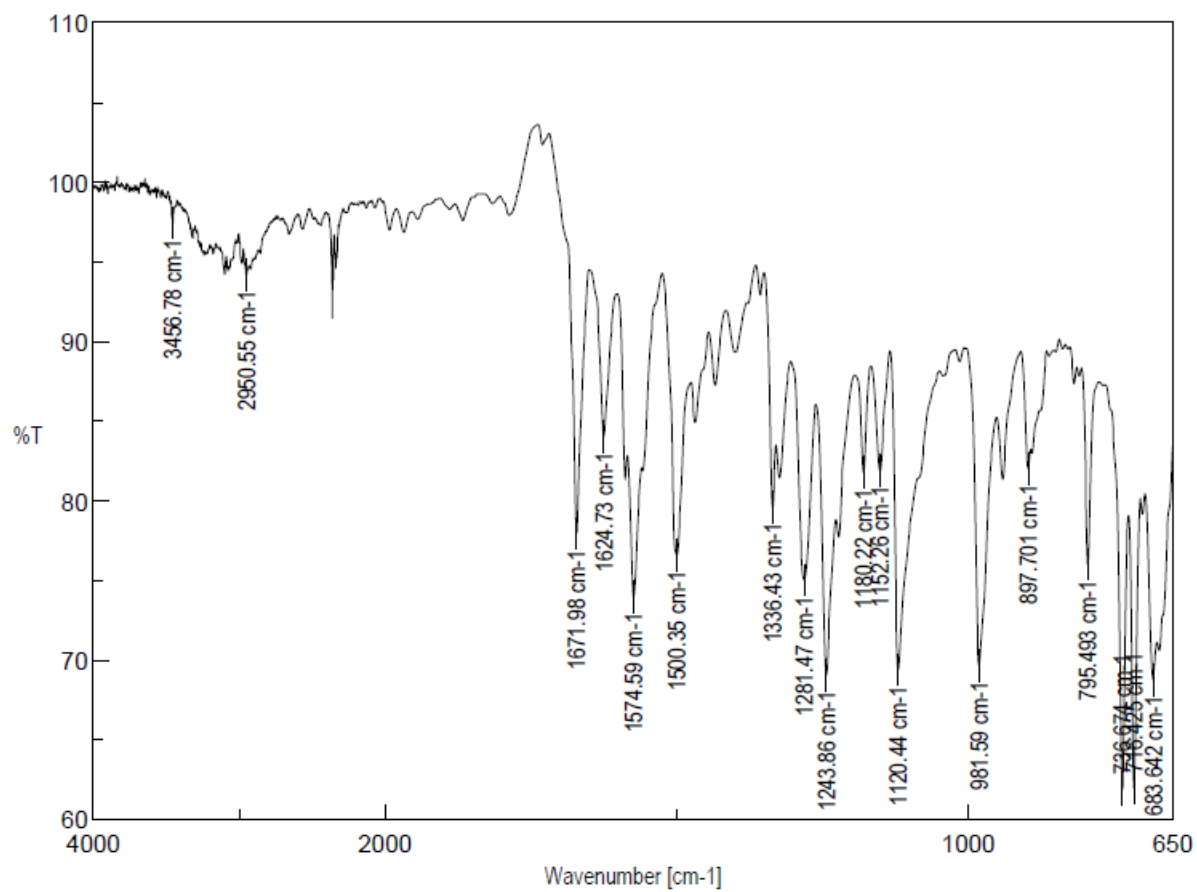

10) 2,4-Dibromo-1-(ethylamino)anthracene-9,10-dione (2j)

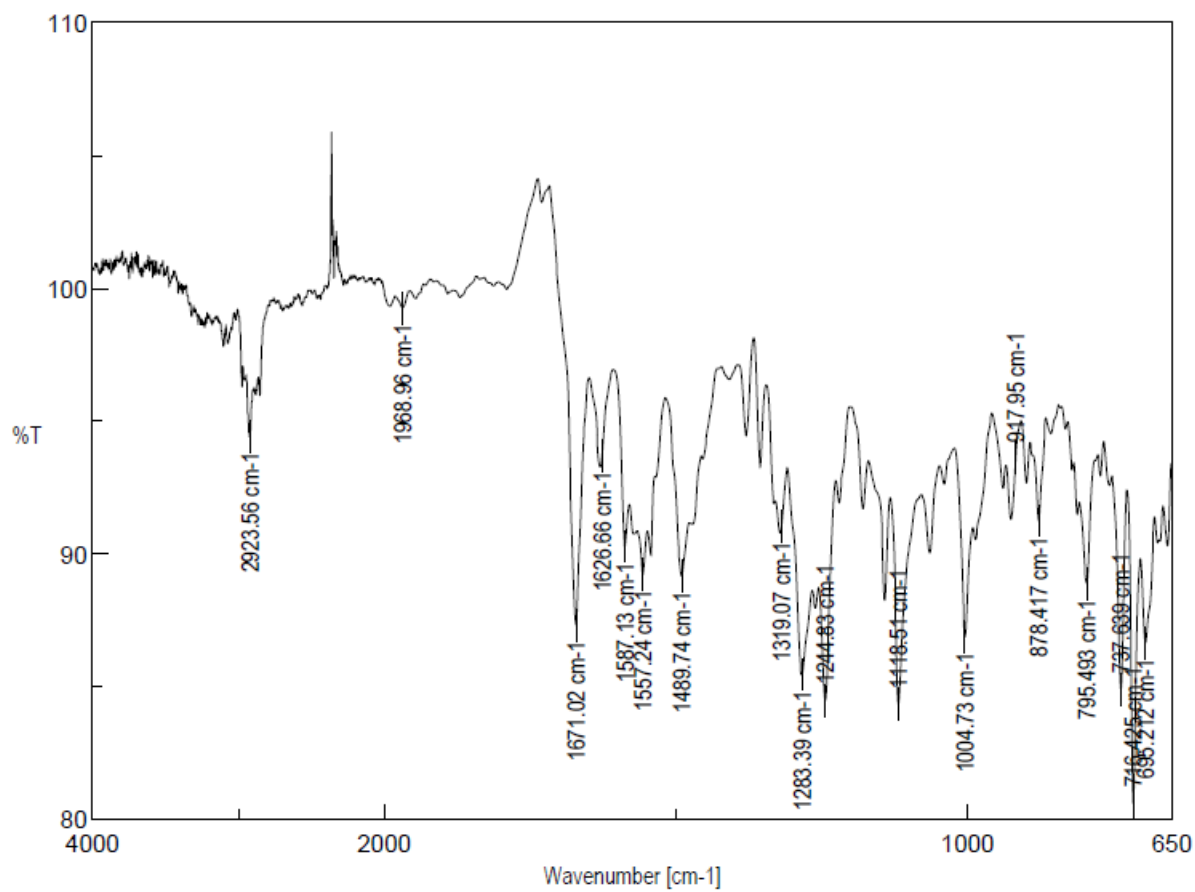

11) 3-Bromo-7H-benzo[*d,e*]anthracen-7-one (2k)

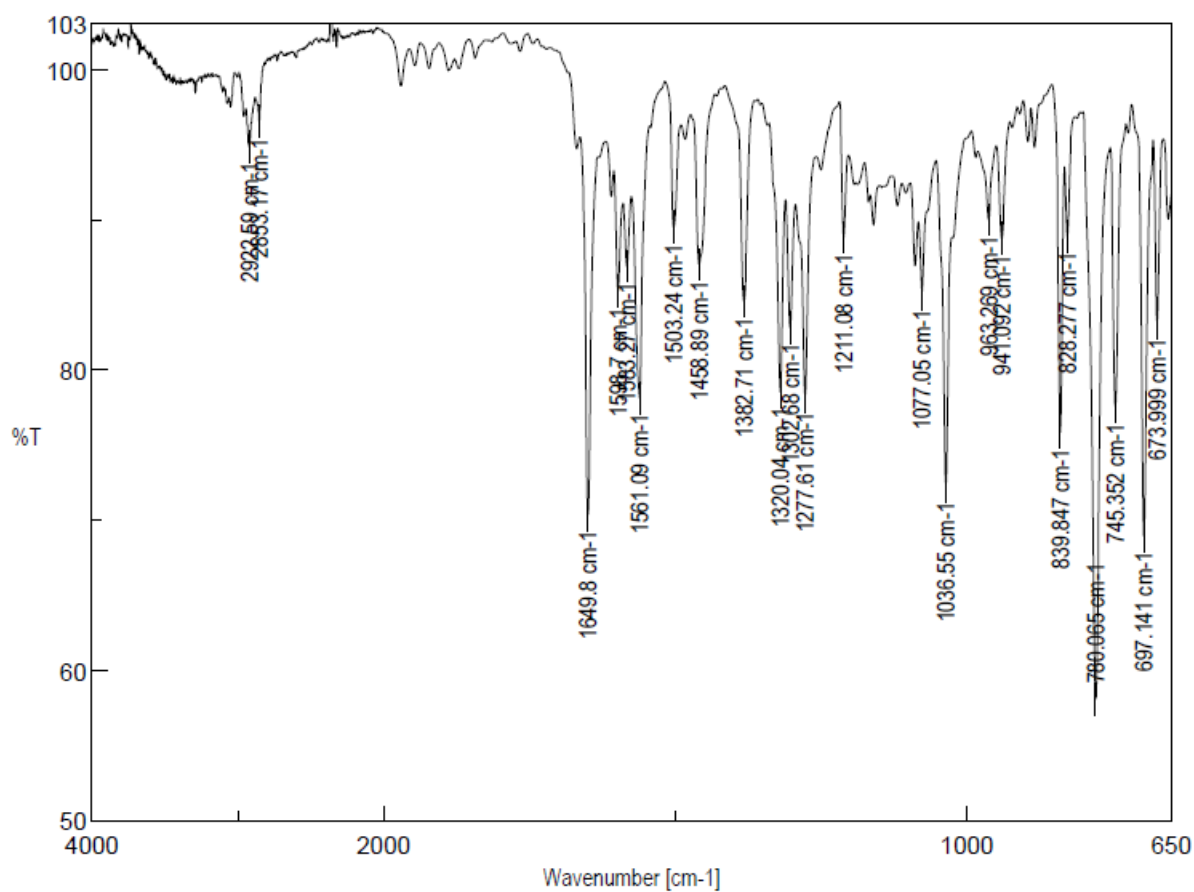

# EIMS Spectra

## 1) 1-Amino-2,4-dibromoanthracene-9,10-dione (2a)

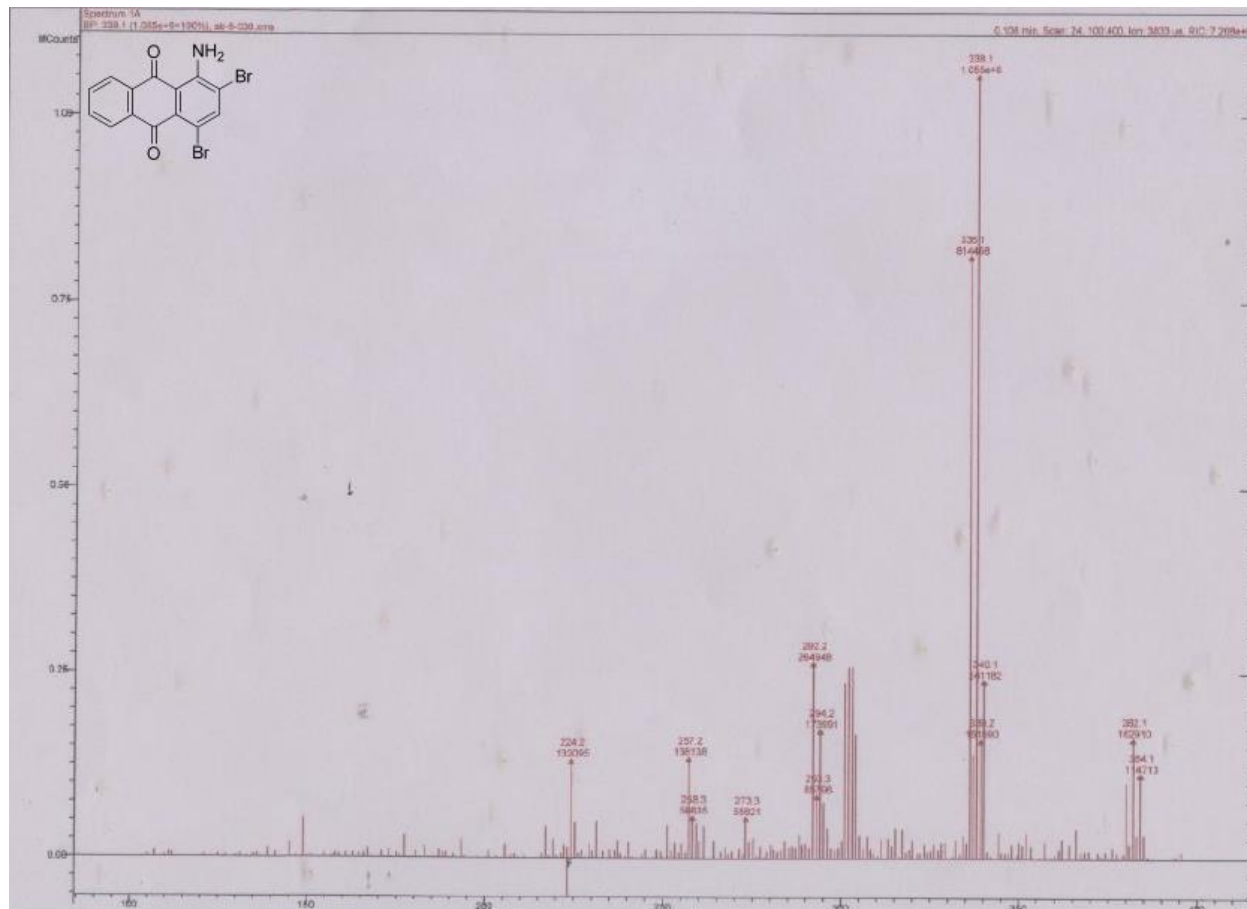

## 2) 2-Amino-3-bromo-1-chloroanthracene-9,10-dione (2b)

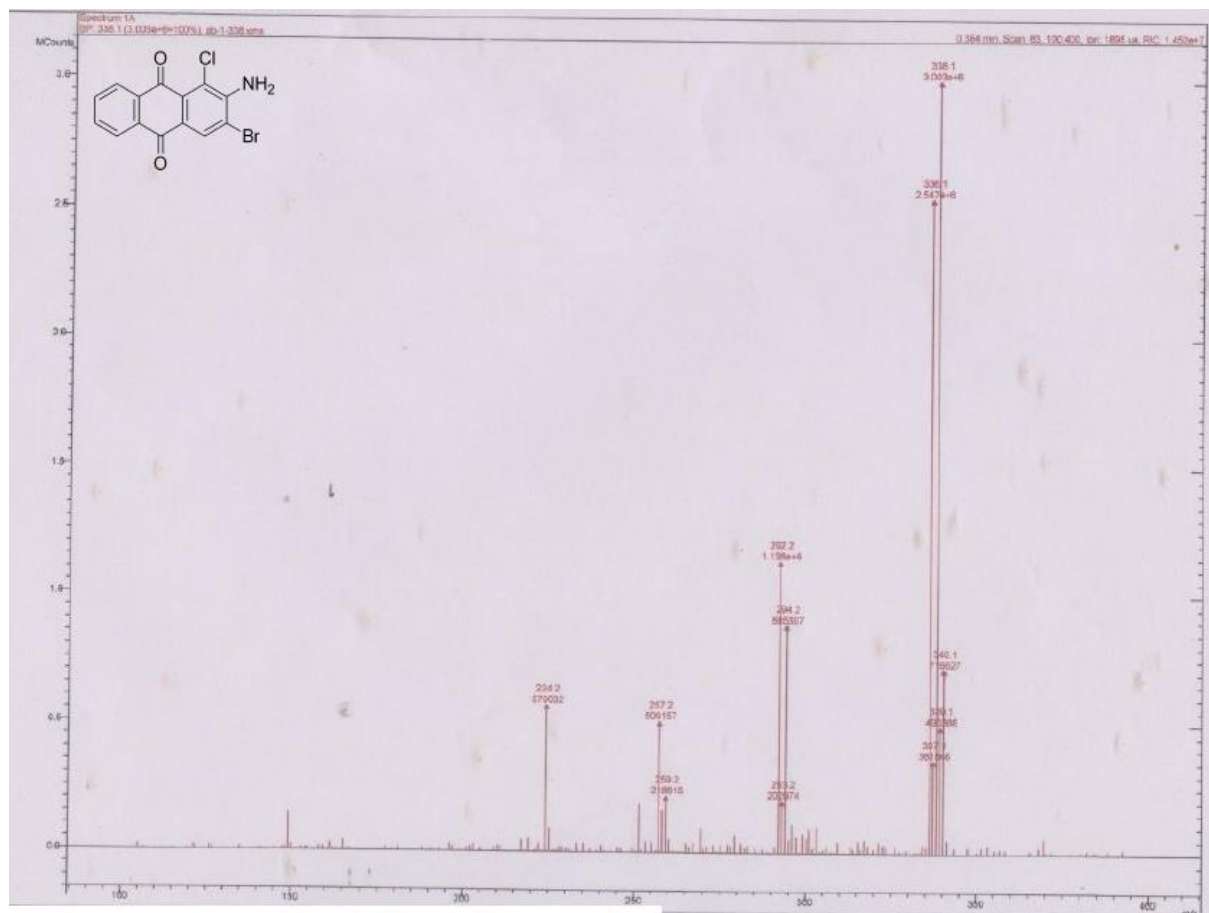

3) 1-Amino-2,4-dibromo-5-chloroanthracene-9,10-dione (2c)

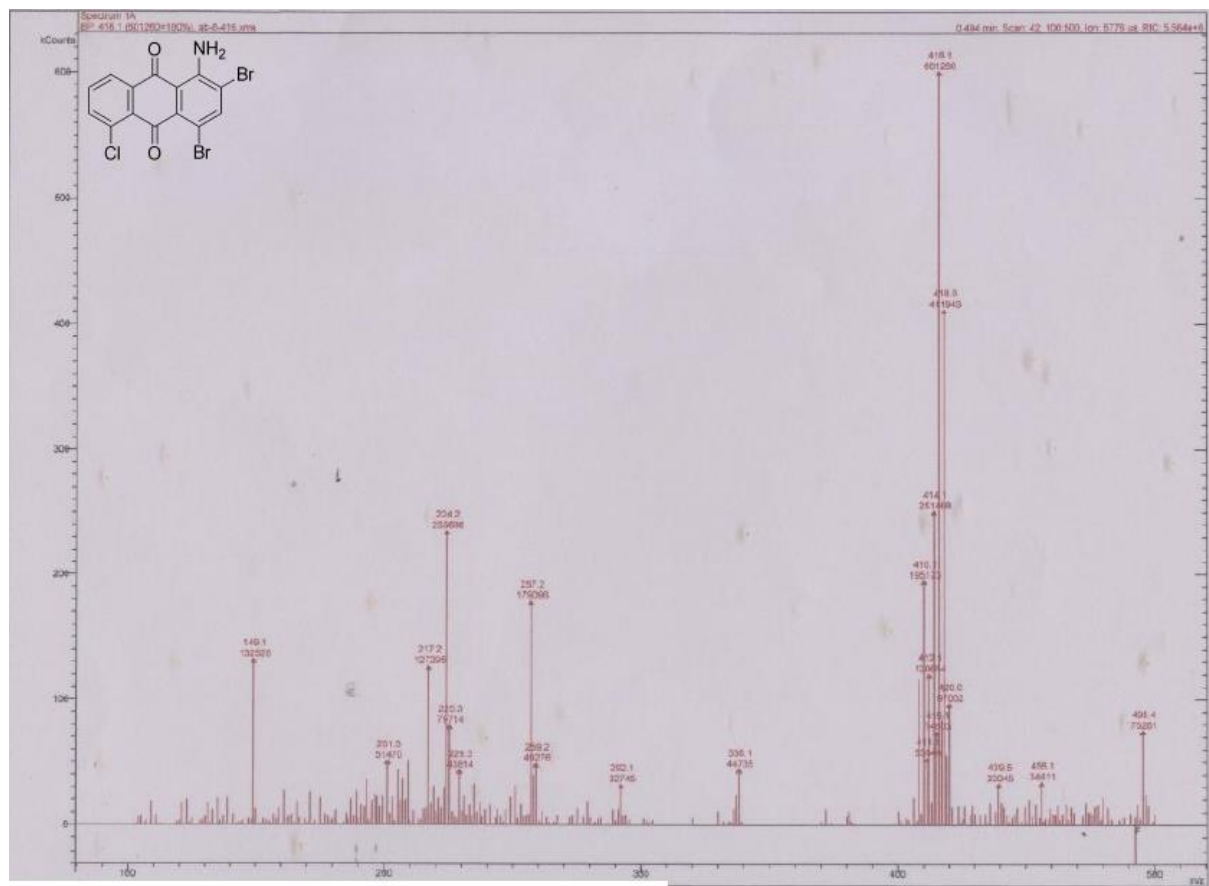

#### 4) 2-Amino-1,3-dibromoanthracene-9,10-dione (2d)

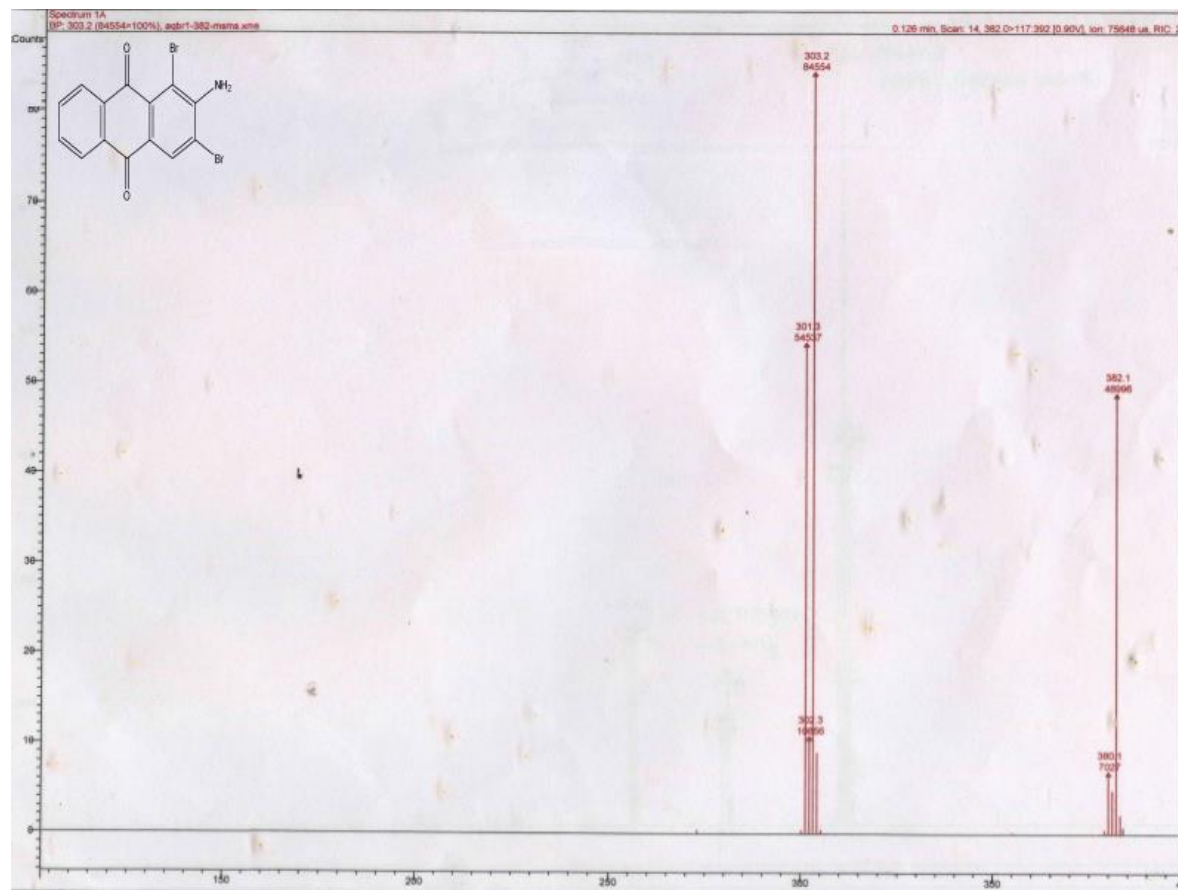



5) 1-Amino-2,4-dibromo-5-(phenylamino)anthracene-9,10-dione (2e)

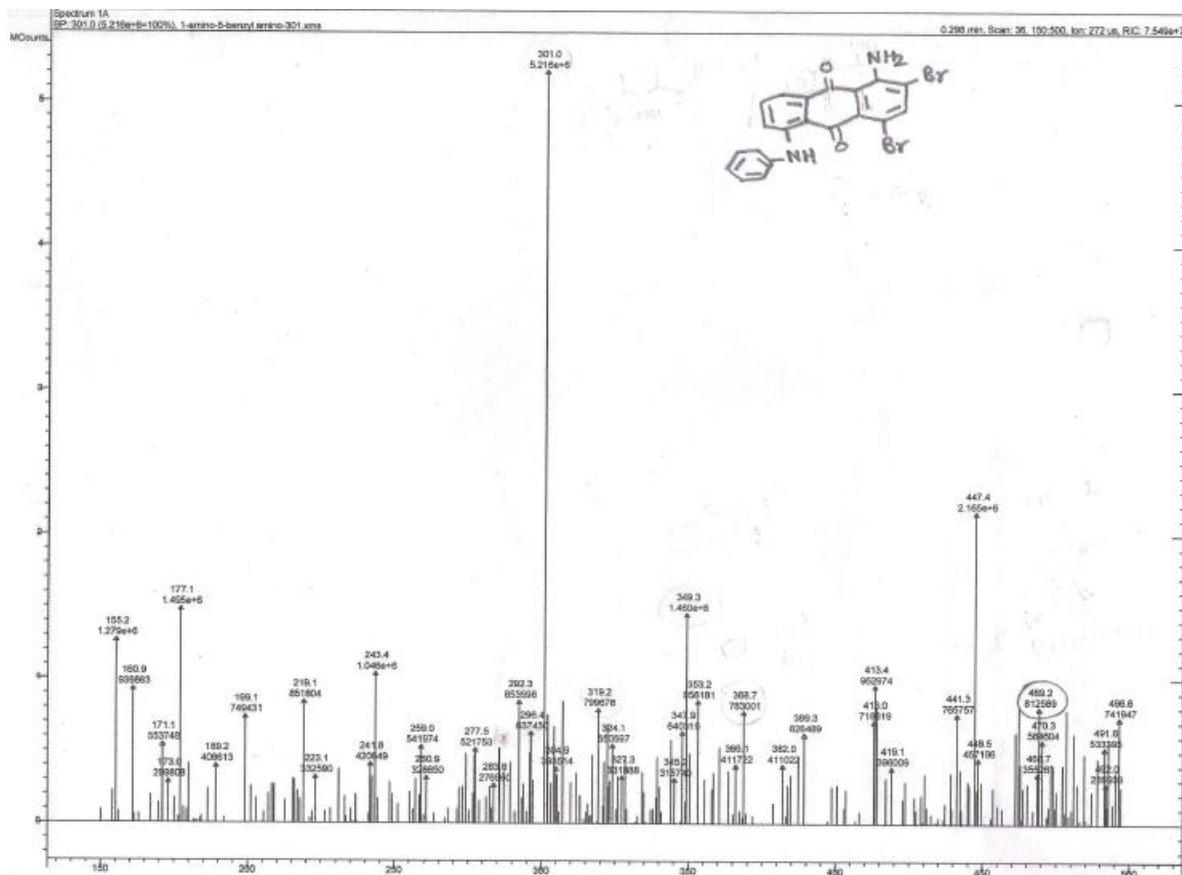

6) 1,5-Diamino-2,4,6,8-tetrabromoanthracene-9,10-dione (2f)

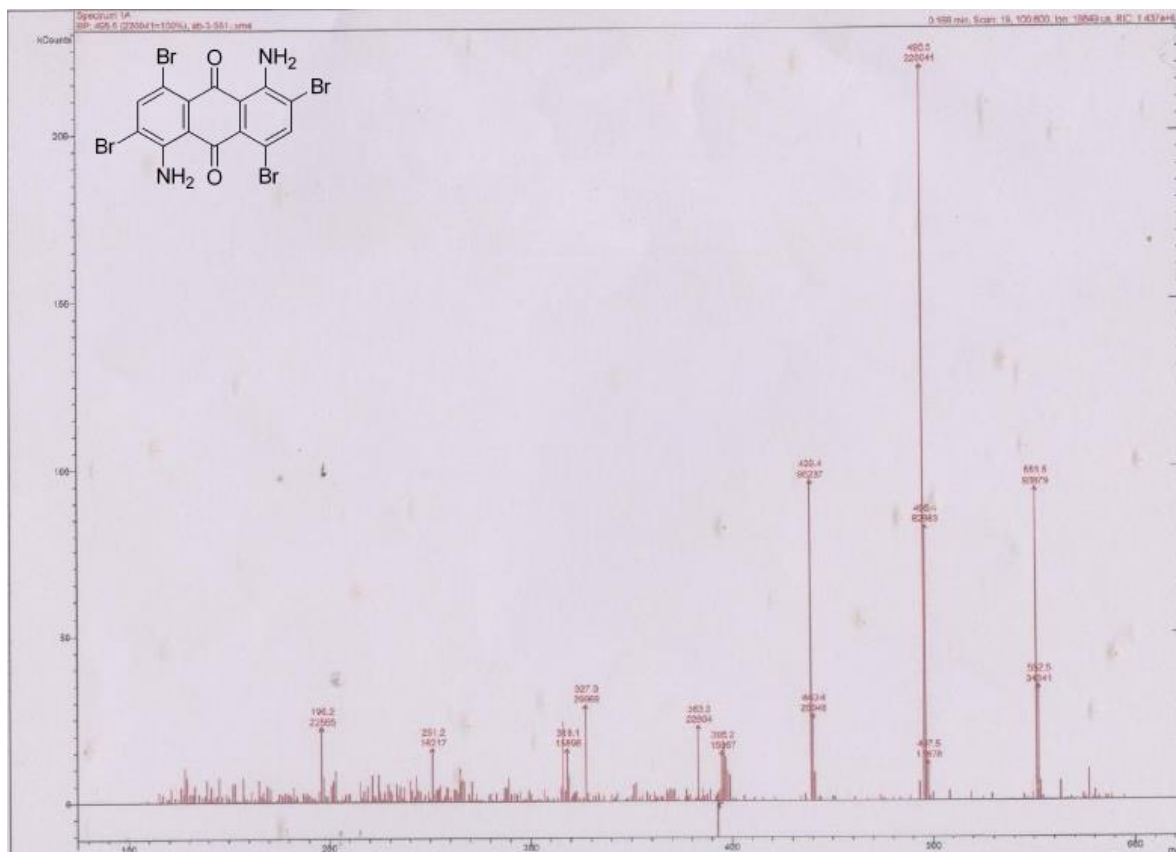

7) 1-Amino-2-bromo-4-methoxyanthracene-9,10-dione (2g)

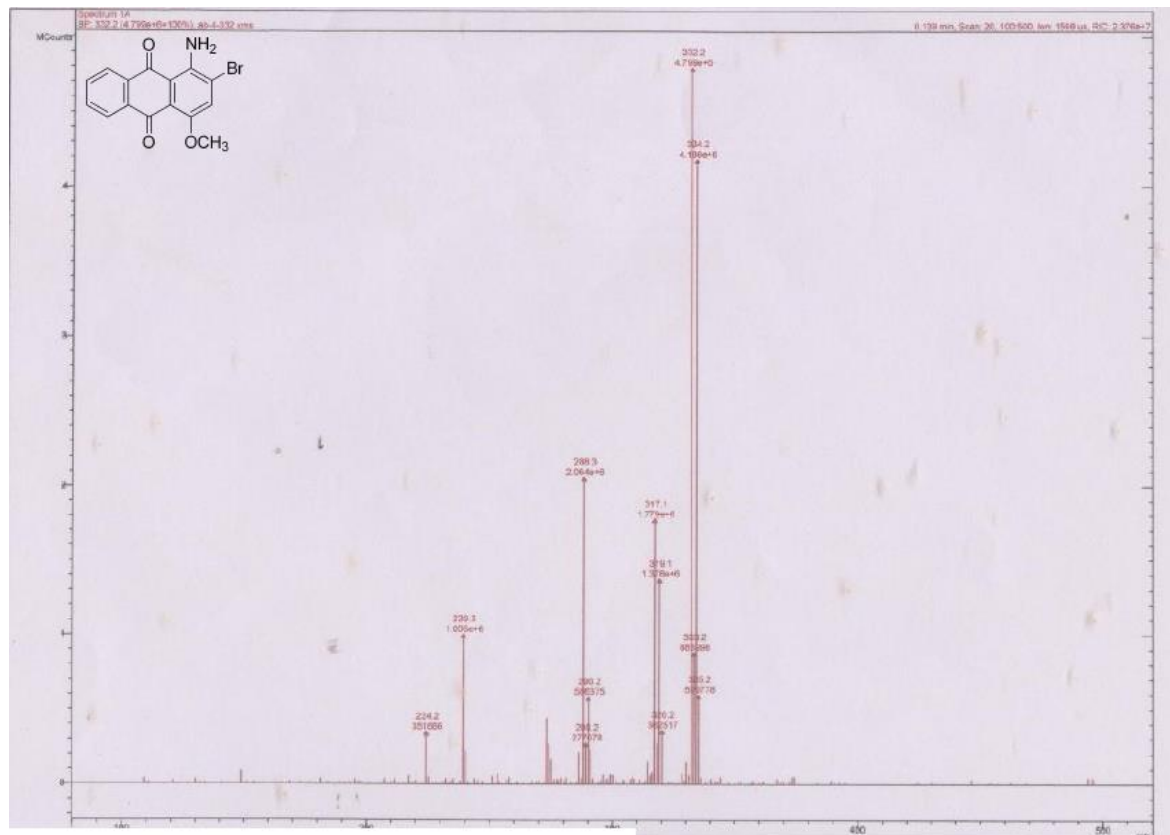

8) *N*-(4-amino-3-bromo-9,10-dioxo-9,10-dihydroanthracen-1-yl)benzamide (2h)

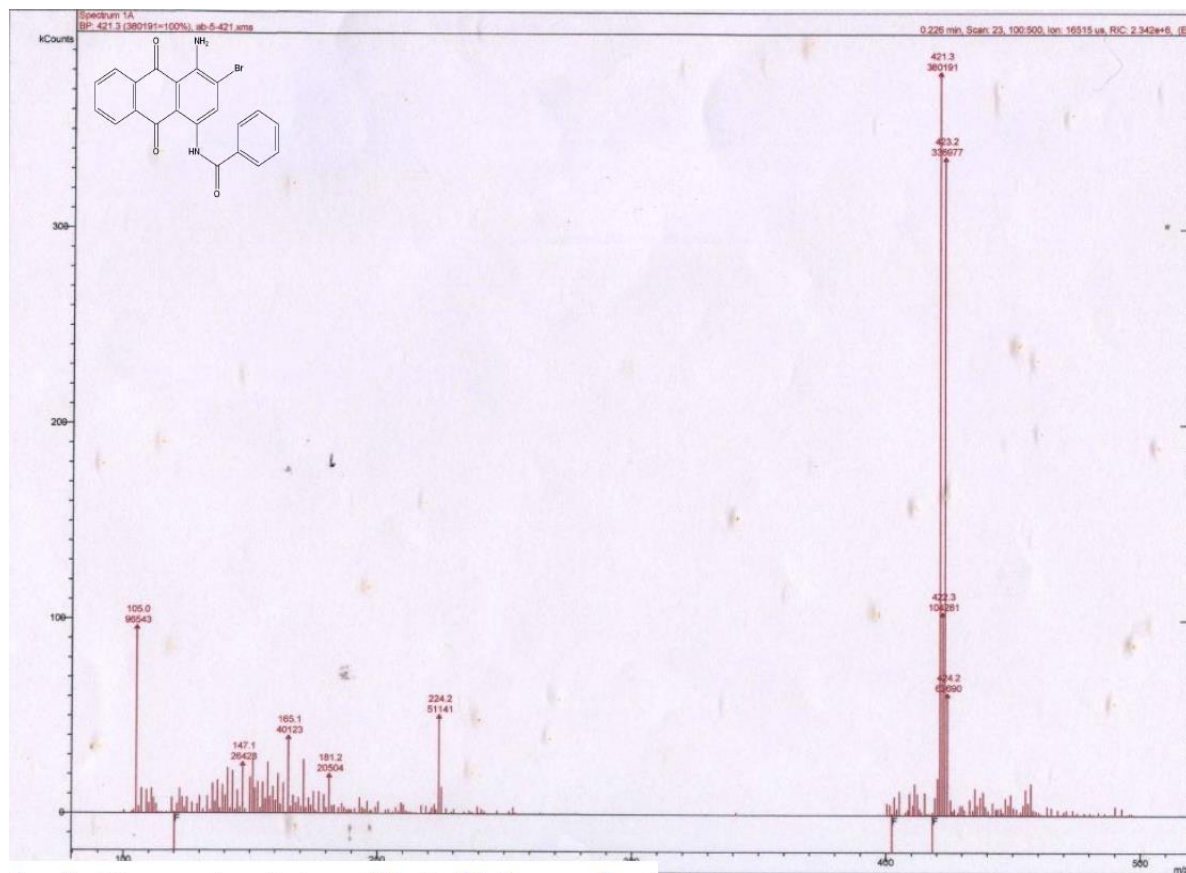

9) 2,4-Dibromo-1-(methylamino)anthracene-9,10-dione (2i)

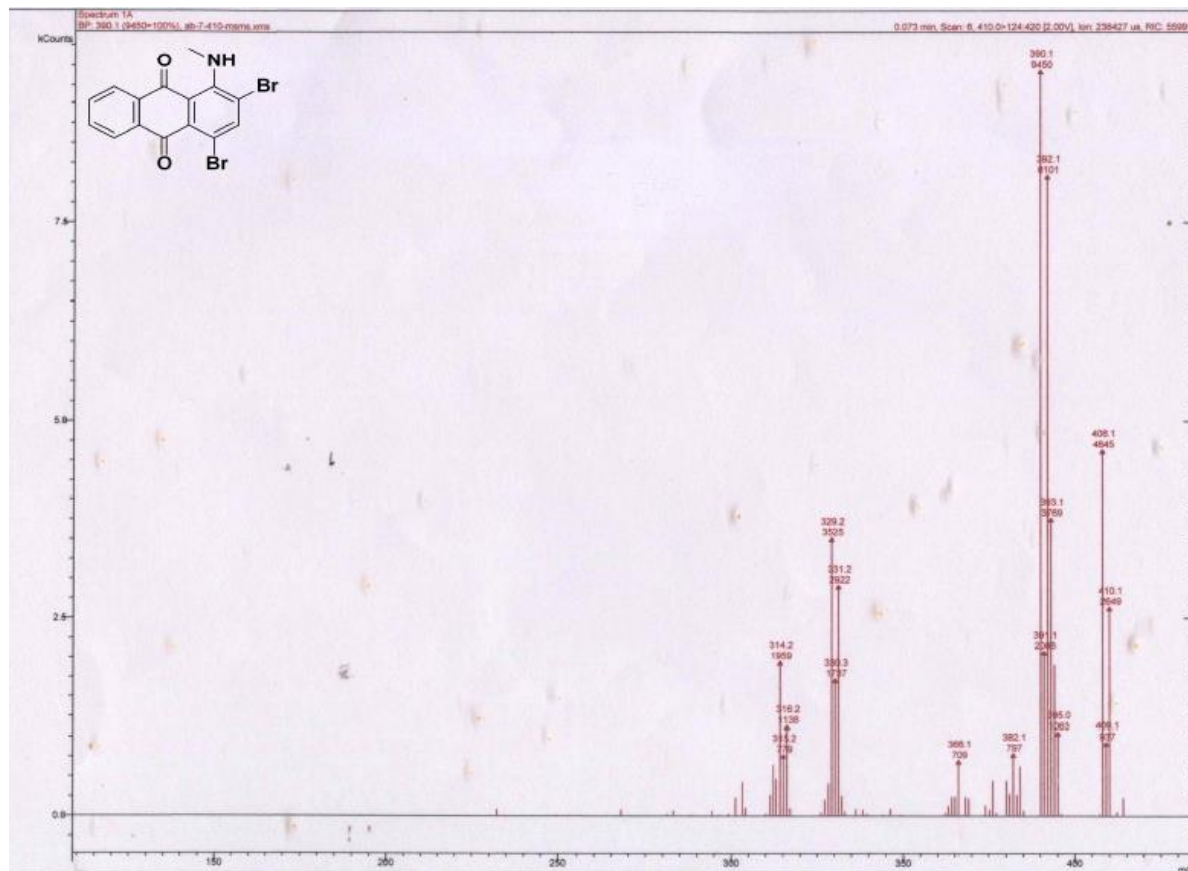

# 10) 2,4-Dibromo-1-(ethylamino)anthracene-9,10-dione (2j)

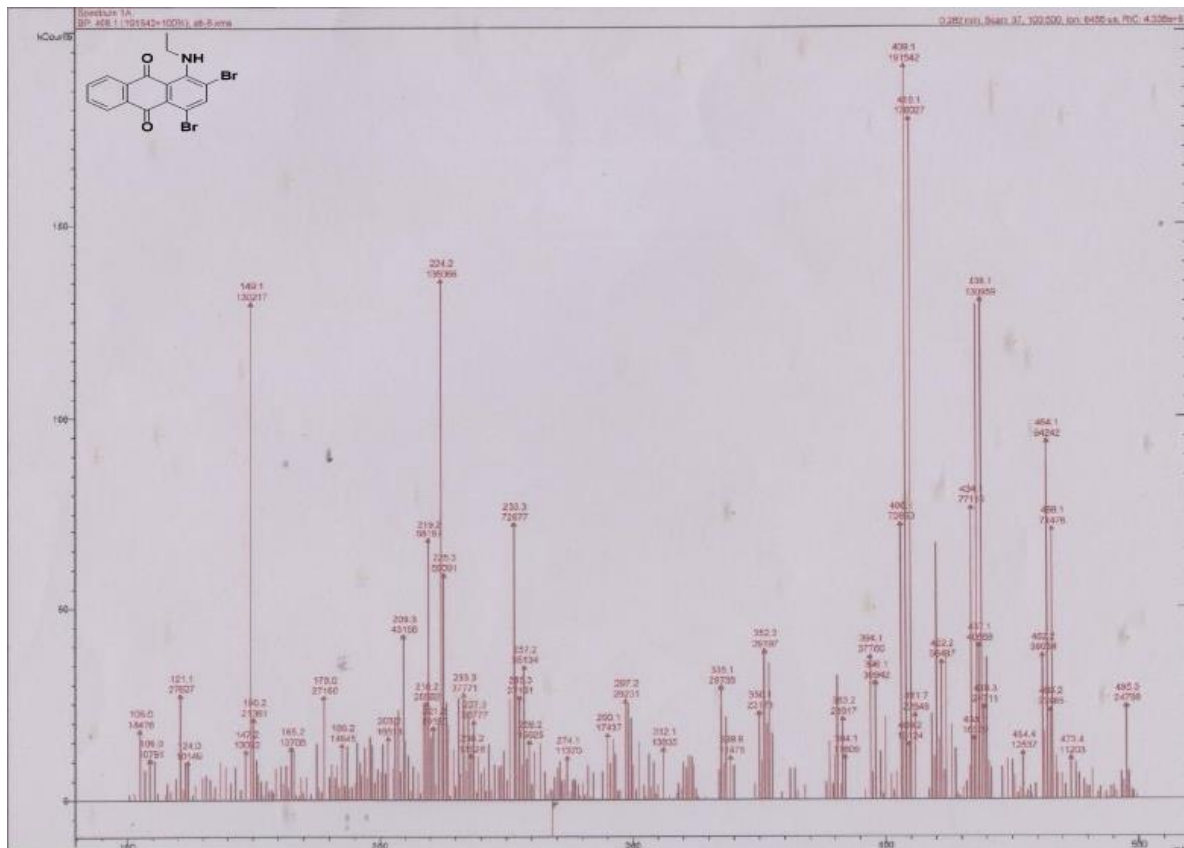

### 11) 3-Bromo-7H-benzo[d,e]anthracen-7-one (2k)

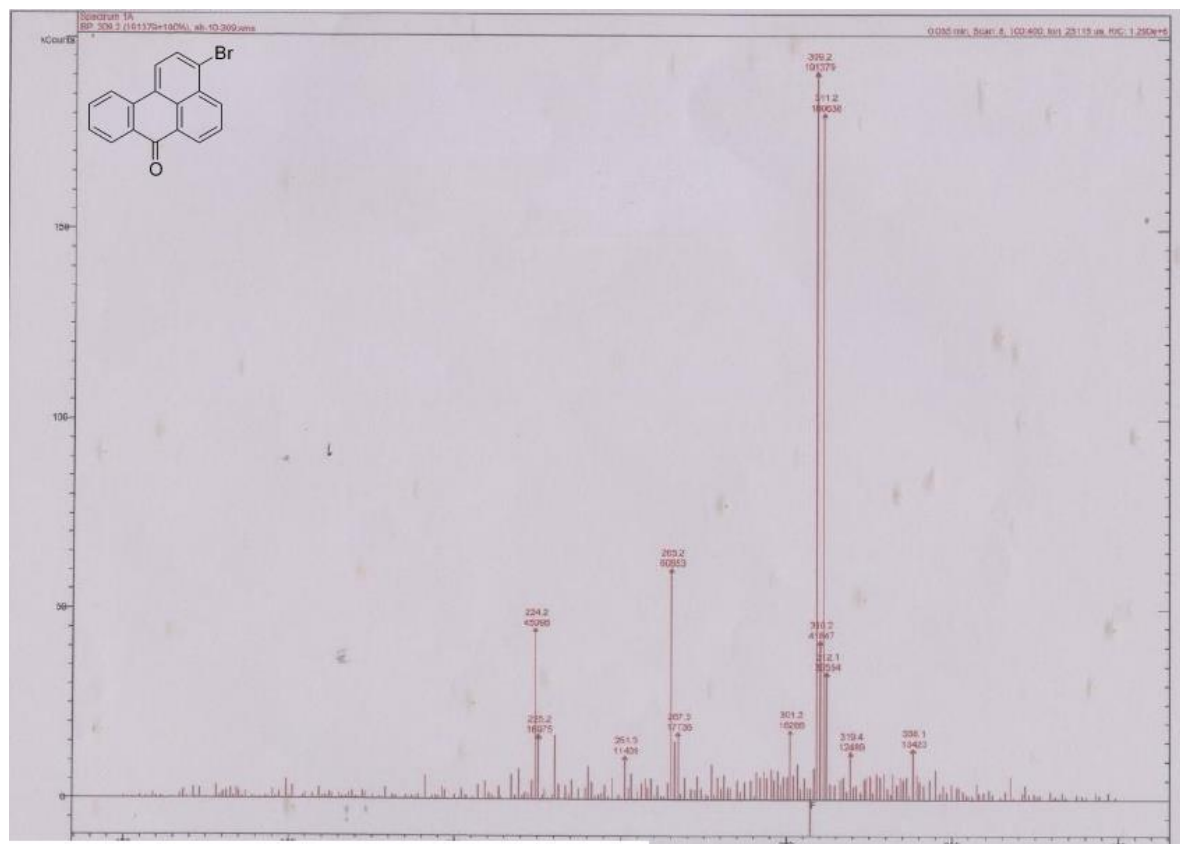

# <sup>1</sup>H NMR Spectra

## 1) 1-Amino-2,4-dibromoanthracene-9,10-dione (2a)

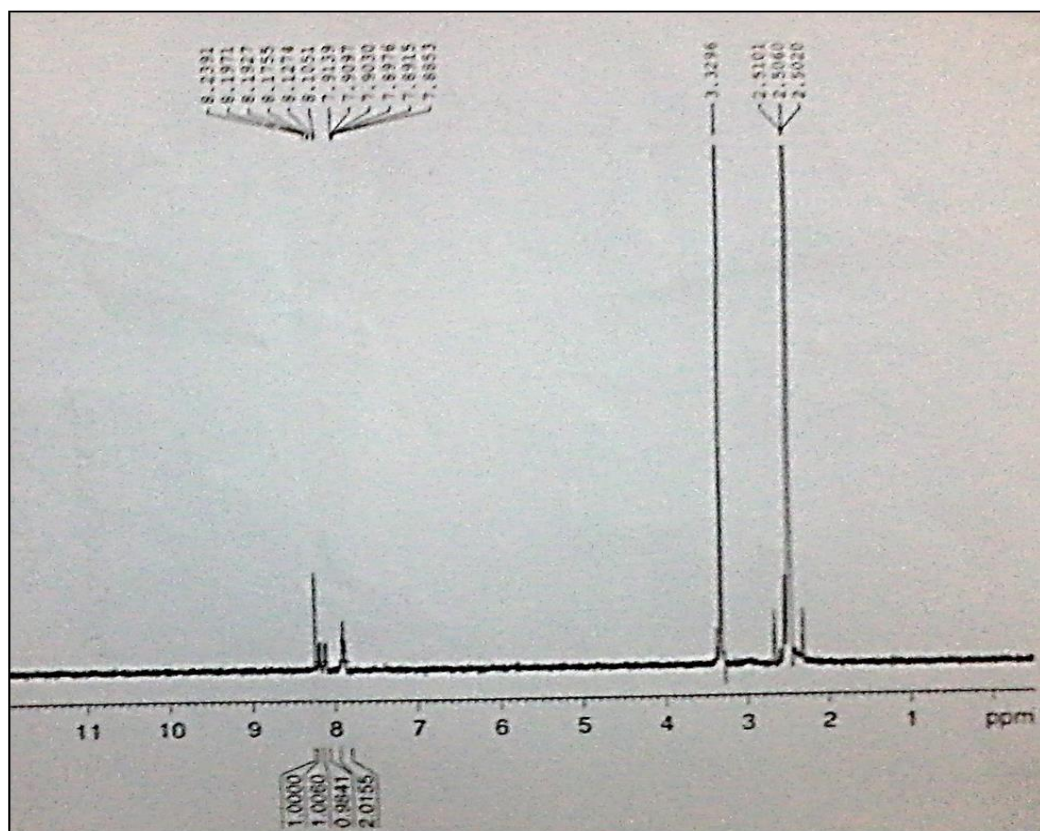



2) 2-Amino-3-bromo-1-chloroanthracene-9,10-dione (2b)

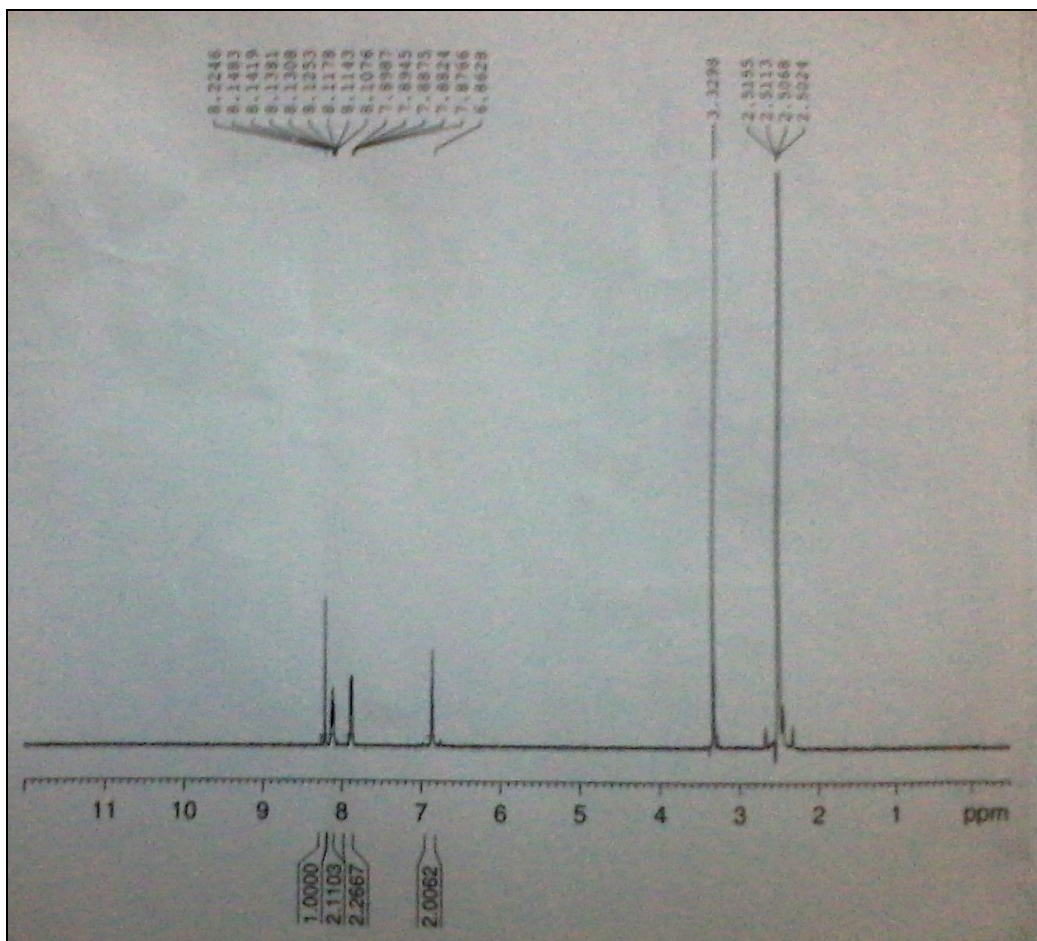

3) 1-Amino-5-chloro-2,4-diaminoanthracene-9,10-dione (2c)

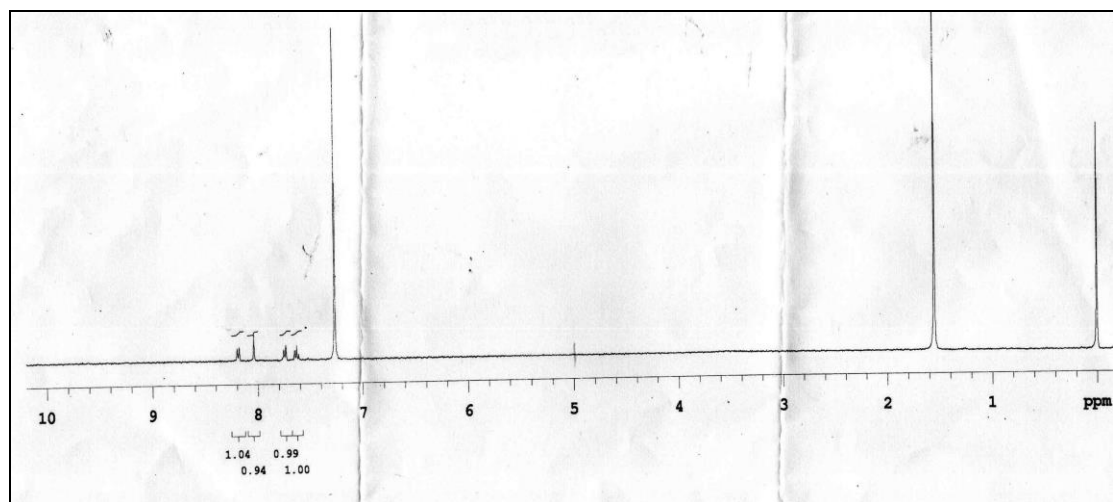

4) 2-Amino-1,3-dibromoanthracene-9,10-dione (2d)

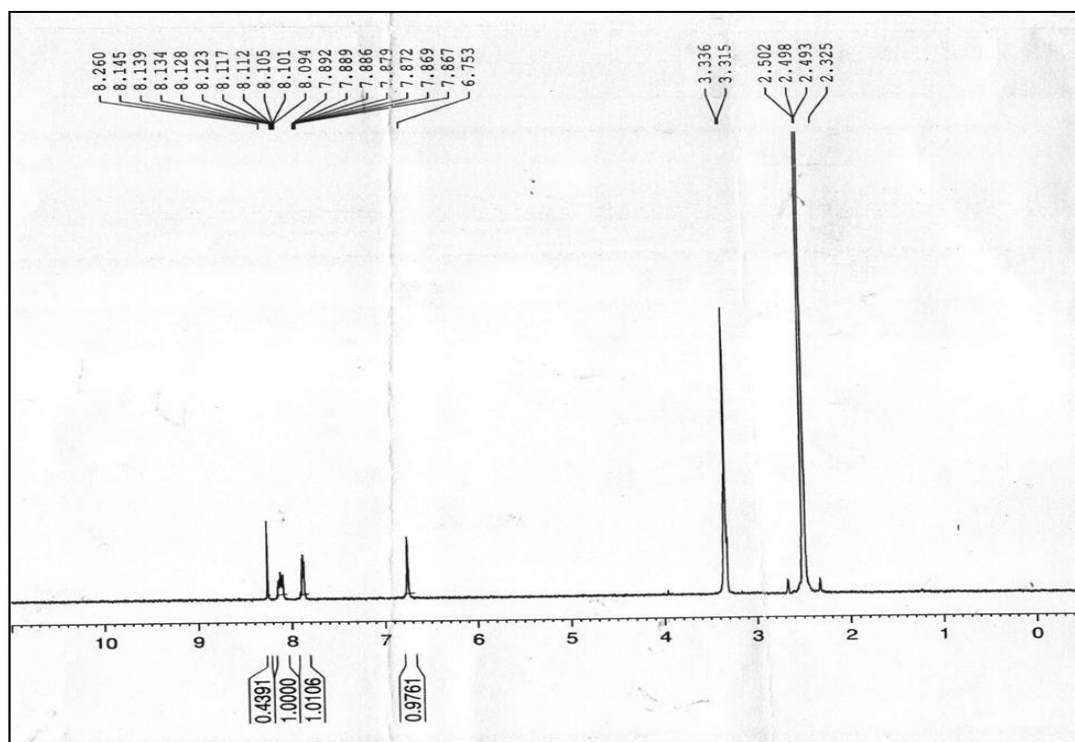

5) 1-Amino-2,4-dibromo-5-(phenylamino)anthracene-9,10-dione (2e)

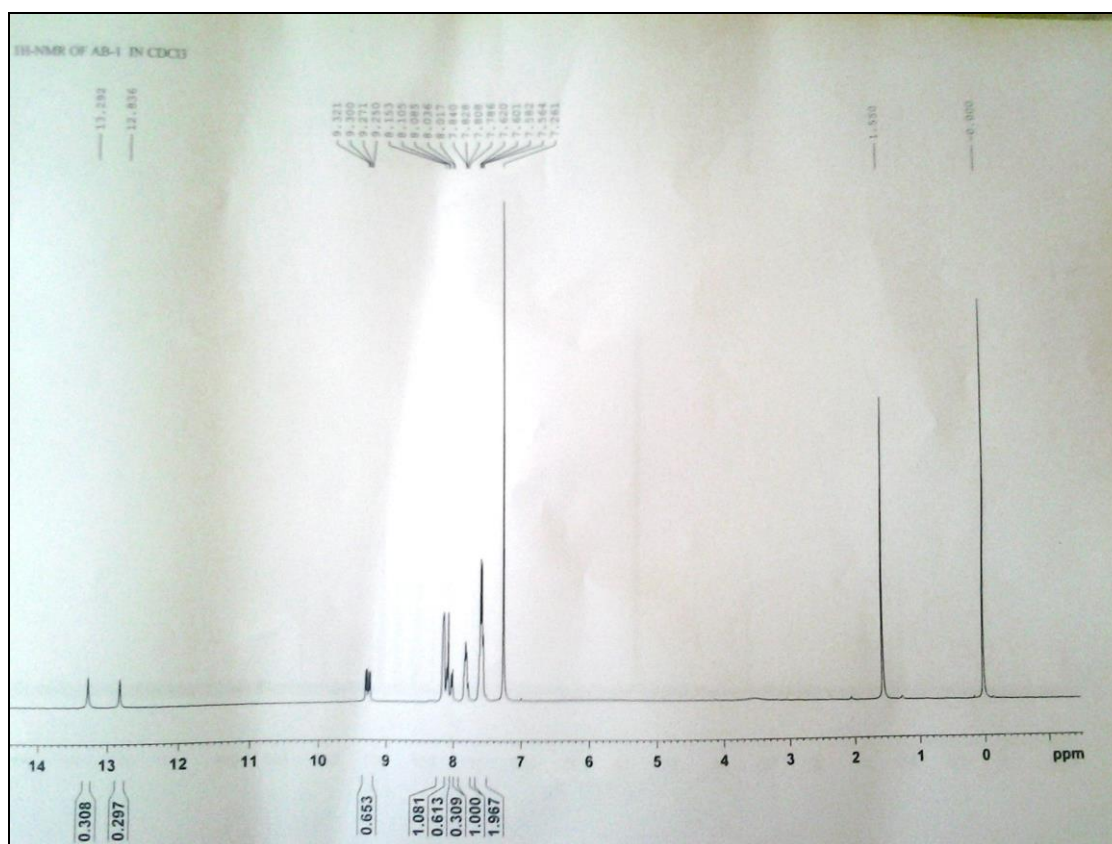

6) 1,5-Diamino-2,4,6,8-tetrabromoanthracene-9,10-dione (2f)

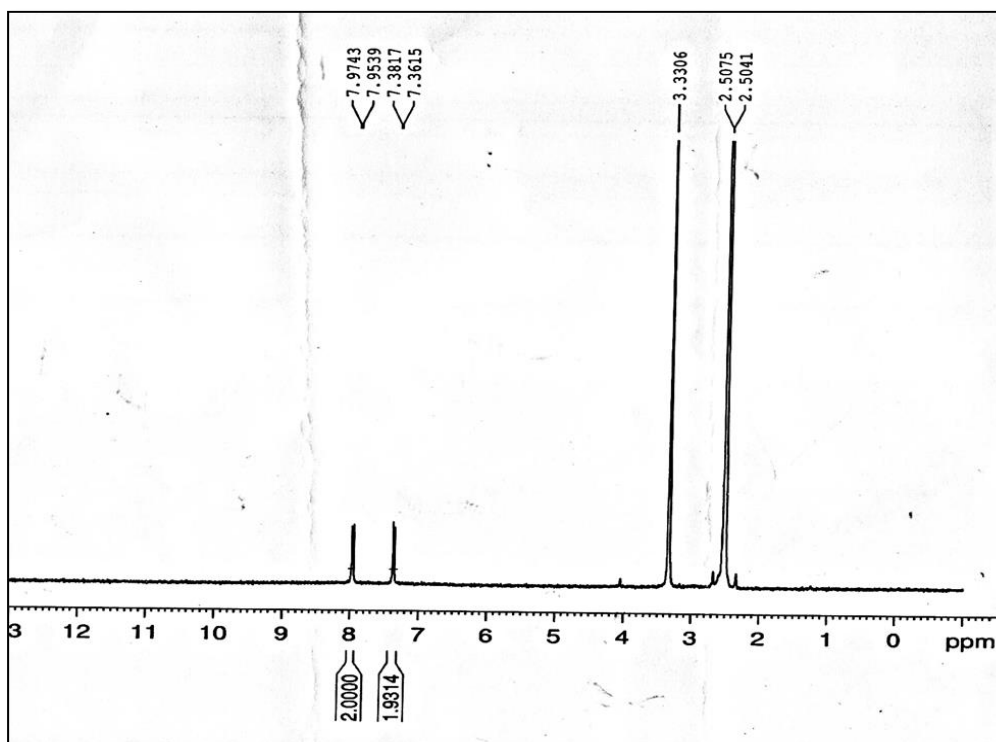

7) 1-Amino-2-bromo-4-methoxyanthracene-9,10-dione (2g)

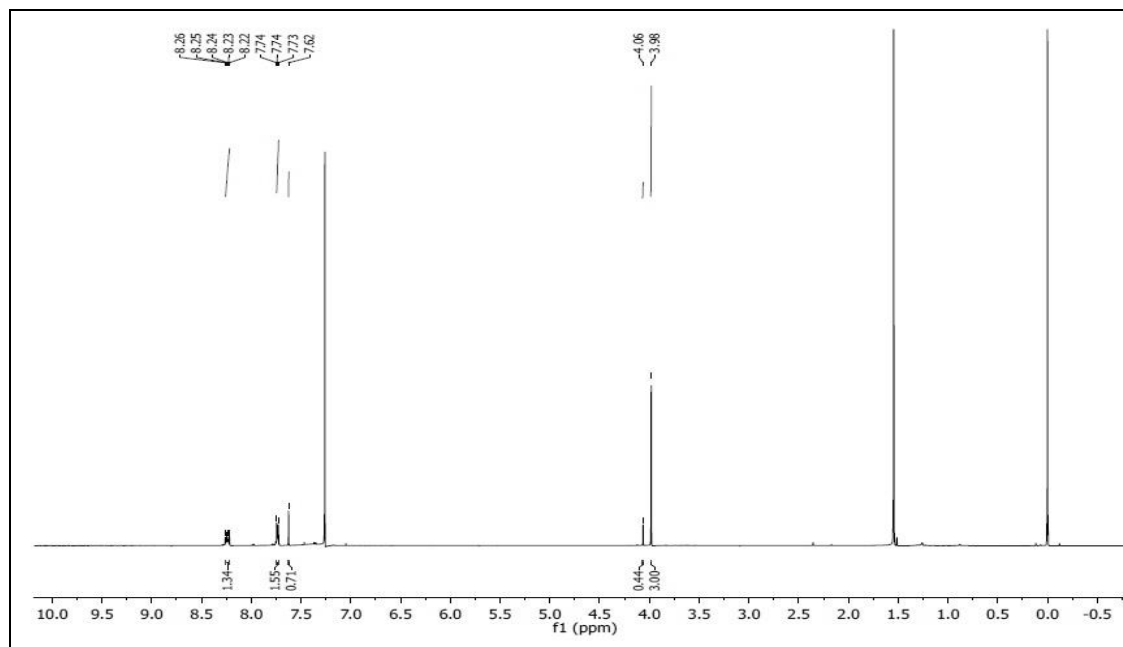

8) N-(4-amino-3-bromo-9,10-dioxo-9,10-dihydroanthracen-1-yl)benzamide (2h)

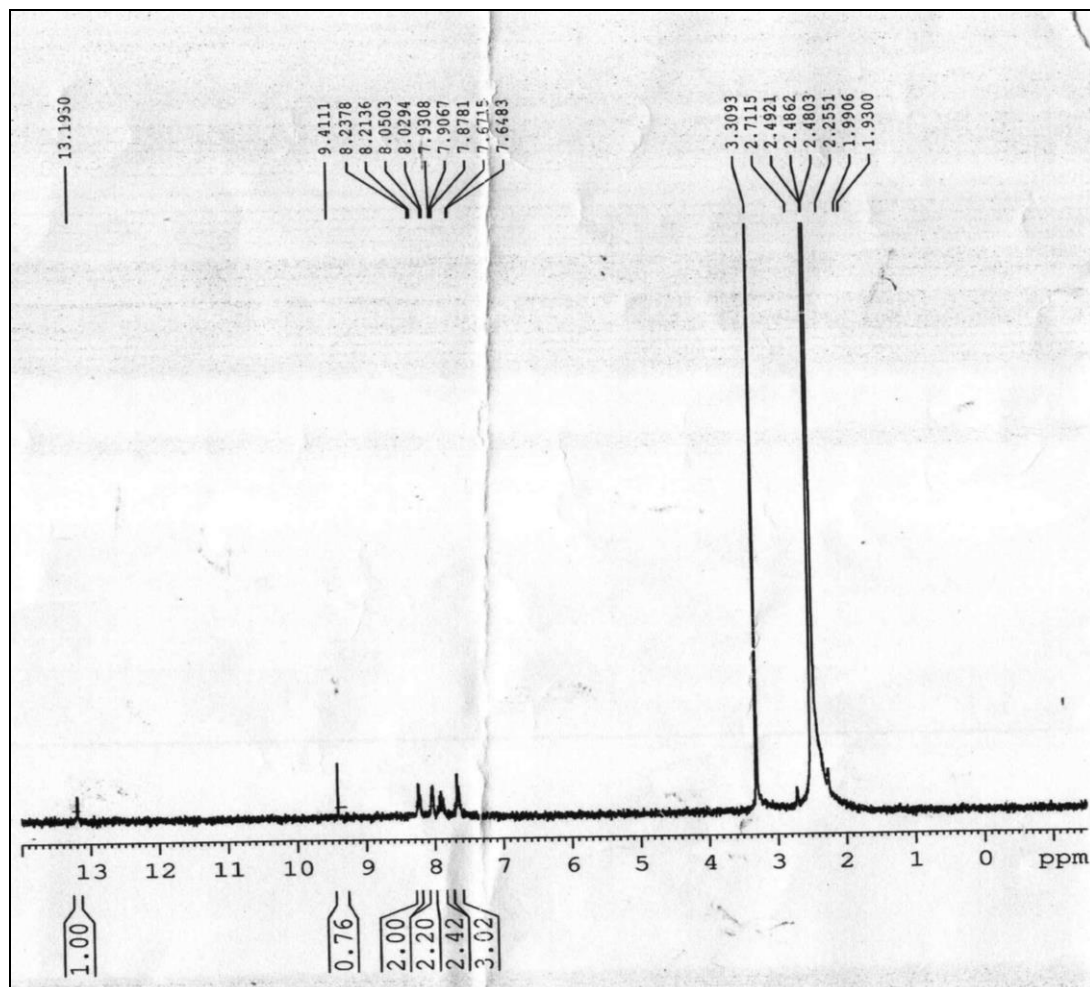

9) 2,4-Dibromo-1-(methylamino)anthracene-9,10-dione (2i)

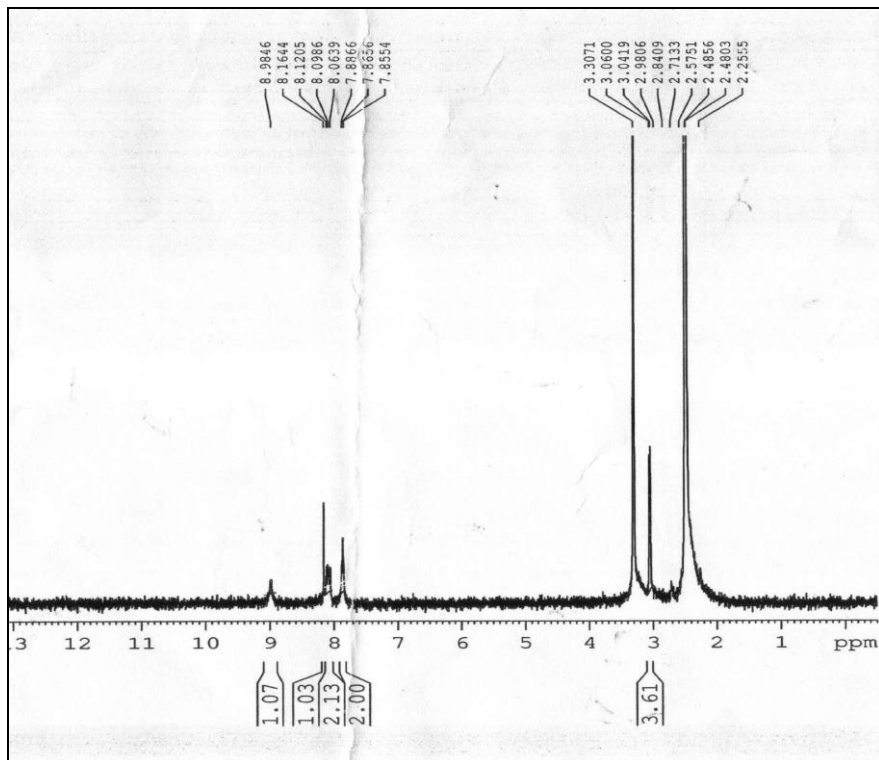



**10) 2,4-Dibromo-1-(ethylamino)anthracene-9,10-dione (2j)**

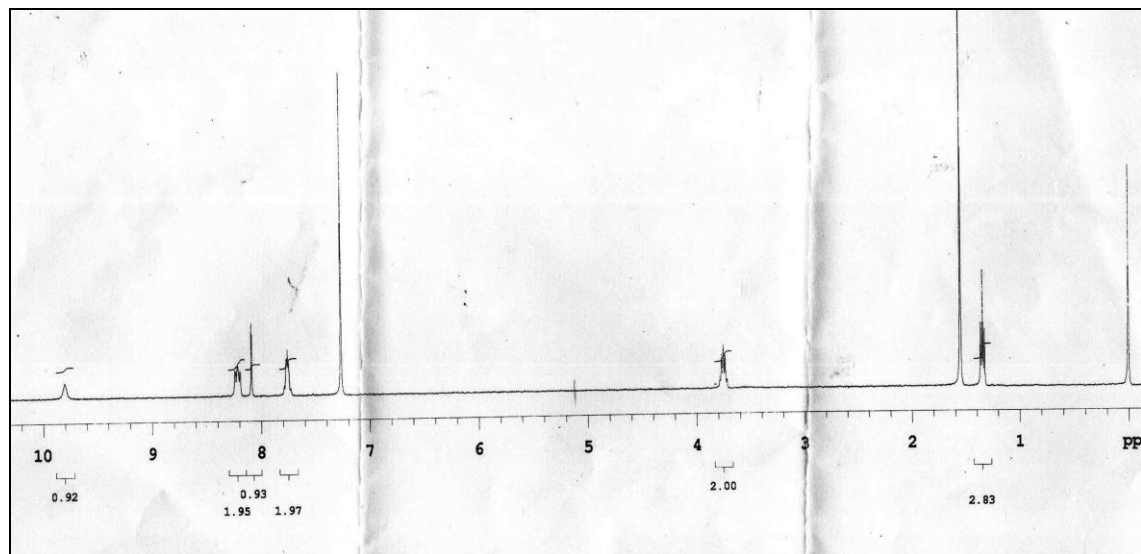

11) 3-Bromo-7H-benzo[d,e]anthracen-7-one (2k)

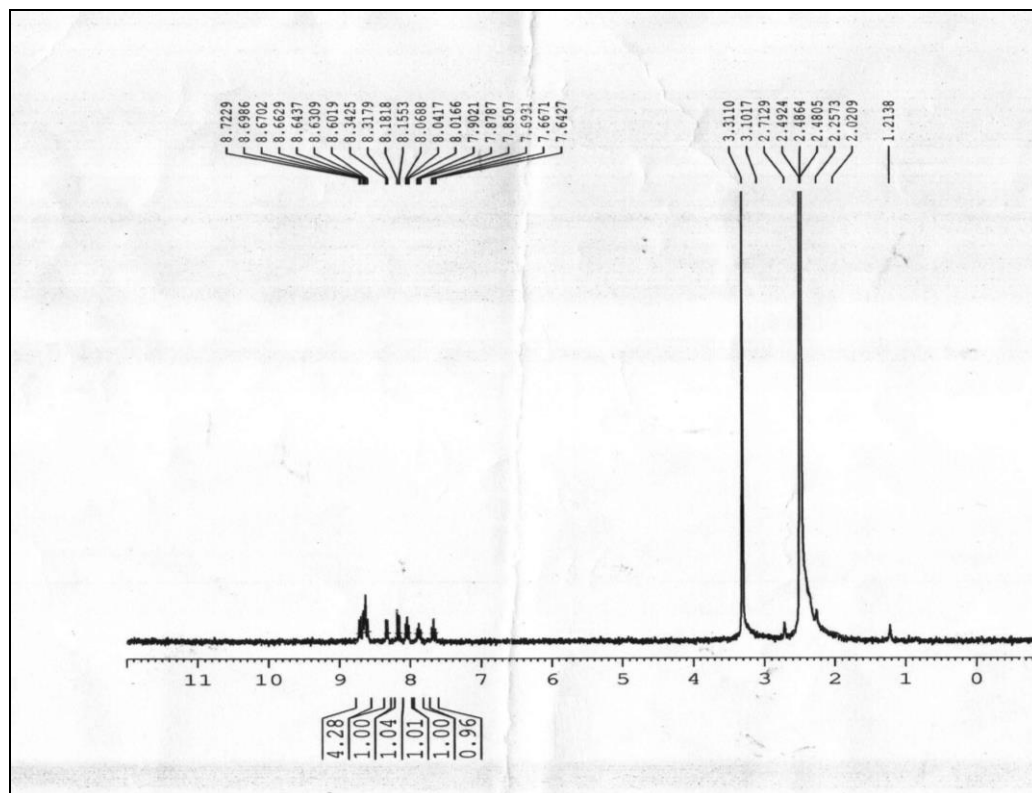

## DSC analysis of nonanebis(peroxoic acid)

➤ **Instrument:** DSC Q100 V9.9 Build 303 (Universal V4.5A TA Instrument)

➤ **Operation conditions:**

- Ramp 10.00 °C/min to 300.00 °C
- Gas: Nitrogen
- Flow rate: 50.0 ml/min
- Sample weight taken: 1.3 mg

➤ **DSC graph of nonanebis(peroxoic acid):**

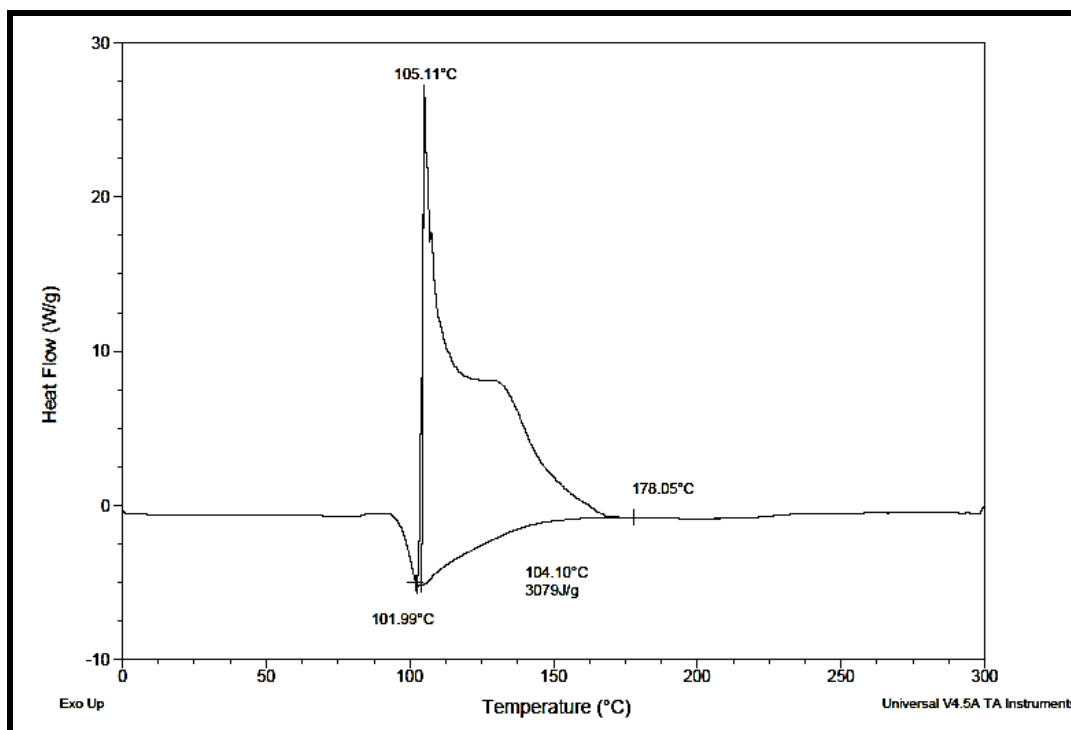

➤ **According to Yoshida's correlation equation: [1]**

- Shock Sensitivity (SS)** =  $[\log(Q_{\text{dsc}}) - 0.72] [\log(T_{\text{dsc}} - 25) - 0.98]$
- Explosion Propagation (EP)** =  $[\log(Q_{\text{dsc}}) - 0.38] [\log(T_{\text{dsc}} - 25) - 1.67]$

Where,  $Q_{\text{dsc}}$  = Energy of the exotherm in calories/g

$T_{\text{dsc}}$  = The onset temperature of the exotherm in °C

➤ **Calculation:**

1. **The values of  $T_{\text{dsc}}$  and  $Q_{\text{dsc}}$  obtained from DSC graph**

a.  $T_{\text{dsc}} = 104.10 \text{ }^\circ\text{C}$

b.  $Q_{\text{dsc}} = 3079 \text{ J/g} = 0.0007354 \text{ calories/g}$

2. **Shock Sensitivity (SS)**

$$\begin{aligned} \text{SS} &= [\log(Q_{\text{dsc}}) - 0.72] [\log(T_{\text{dsc}} - 25) - 0.98] \\ &= [\log(0.0007354) - 0.72] [\log(104.1 - 25) - 0.98] \\ &= [-3.8534] [0.9181] \\ &= -\mathbf{3.5381} \end{aligned}$$

3. **Explosion Propagation (EP)**

$$\begin{aligned} \text{EP} &= [\log(Q_{\text{dsc}}) - 0.38] [\log(T_{\text{dsc}} - 25) - 1.67] \\ &= [\log(0.0007354) - 0.38] [\log(104.1 - 25) - 1.67] \\ &= [-3.6134] [0.2281] \\ &= -\mathbf{0.8016} \end{aligned}$$

➤ **Conclusion:**

*“According to this equation, if the value for Shock sensitivity (SS) or Explosion Propagation (EP) is  $\geq 0.00$ , then the material is predicated to be shock sensitive or demonstrate explosive propagating properties, respectively.”*

**From the above calculation it was clear that, the nonanebis(peroxoic acid) is non-shock sensitive as well as it does not exhibit explosive propagation properties.**

## **Details of HPLC analysis**

| <b>Sr. No.</b> | <b>Parameters</b> | <b>Description</b>                        |
|----------------|-------------------|-------------------------------------------|
| 1.             | Instrument        | Jasco 2000                                |
| 2.             | Column            | HiQ Sil C18HS, size : 4.6 mm × 250 mm.    |
| 3.             | Mobile Phase      | 90% acetonitrile + 10% methanol           |
| 4.             | Flow rate         | 1 ml/min                                  |
| 5.             | Wavelength        | 235 nm                                    |
| 6.             | Detector          | UV detector                               |
| 7.             | Sample dilution   | All samples are dissolved in mobile phase |
| 8.             | Sample injected   | 5 microliters                             |

**Note: All solvents used as HPLC grade**

## Detection of active oxygen content

### Preparation of solutions:

1. 0.1 M  $\text{Na}_2\text{S}_2\text{O}_3 \cdot 5\text{H}_2\text{O}$  : Dissolve 25 g sodium thiosulfate in 1 L boiled distilled water.
2. 50% Potassium Iodide: 50 g potassium iodide in 50 mL distilled water.
3. 10% (v/v) sulfuric acid: Take 10 mL 98% sulfuric acid and dilute it up to 100 mL with distilled water.
4. Starch solution: Take 0.1 g starch and dissolve it in 100 mL distilled water. Heat the above solution till it boil. Then cool this solution to rt (room temperature)
5. Solvent for water insoluble peracids : (Acetic acid/chloroform) (3:2)

### Process:

1. In 250 mL iodine flask, take 0.15 to 4 g sample of peroxy compound.
2. Dissolve it in 20 mL (acetic acid + chloroform) solvent.
3. Add 2 mL 50% potassium iodide solution.
4. Stopper immediately flask, and keep for 5 min.
5. Add 50 mL distilled water.
6. Titrate against 0.1 M sodium thiosulfate solution.
7. Add starch indicator towards endpoint.
8. End point colorless to blue color.

### Calculation:

$$\% \text{ Active O}_2 \text{ content} = \frac{(\text{Burette reading}) (\text{Normality of Na}_2\text{S}_2\text{O}_3) (0.008) (100)}{(\text{Sample weight})}$$

## Reference

1. Richard, K.; Lim, M.; Hachmeister, Z. *Process Safety News*, **2010**, *17*, 3–4.  
<https://www.fauske.com/sites/default/files/ShockExplosionandFrictionHazards-IdentificationandMitigation.pdf>
